# Supplementary material
Source: ML conference proceedings conference paper supplement (https://proceedings.neurips.cc/paper_files/paper/2014/hash/42a0e188f5033bc65bf8d78622277c4e-Abstract.html)
Supplement: Supplementary file [file 42a0e188f5033bc65bf8d78622277c4e-Supplemental.zip]

# Supplement to Parallel Direction Method of Multipliers

## 1 Convergence

We consider the minimization of block-seperable convex functions subject to linear constraints:

$$\min_{\{\mathbf{x}_j \in \mathcal{X}_j\}} f(\mathbf{x}) = \sum_{j=1}^J f_j(\mathbf{x}_j), \text{ s.t. } \mathbf{A}\mathbf{x} = \sum_{j=1}^J \mathbf{A}_j^c \mathbf{x}_j = \mathbf{a}. \quad (1)$$

The (augmented) Lagrangian of (1) is

$$L_\rho(\mathbf{x}, \mathbf{y}) = f(\mathbf{x}) + \langle \mathbf{y}, \mathbf{A}\mathbf{x} - \mathbf{a} \rangle + \frac{\rho}{2} \|\mathbf{A}\mathbf{x} - \mathbf{a}\|_2^2, \quad (2)$$

where  $\rho \geq 0$  is the penalty parameter. PDMM has the following iterates:

$$\mathbf{x}_{j_t}^{t+1} = \underset{\mathbf{x}_{j_t} \in \mathcal{X}_{j_t}}{\operatorname{argmin}} L_\rho(\mathbf{x}_{j_t}, \mathbf{x}_{k \neq j_t}^t, \hat{\mathbf{y}}^t) + \eta_{j_t} B_{\phi_{j_t}}(\mathbf{x}_{j_t}, \mathbf{x}_{j_t}^t), \quad j_t \in \mathbb{I}_t, \quad (3)$$

$$\mathbf{y}_i^{t+1} = \mathbf{y}_i^t + \tau_i \rho (\mathbf{A}_i^r \mathbf{x}^{t+1} - \mathbf{a}_i), \quad (4)$$

$$\hat{\mathbf{y}}_i^{t+1} = \mathbf{y}_i^{t+1} - \nu_i \rho (\mathbf{A}_i^r \mathbf{x}^{t+1} - \mathbf{a}_i), \quad (5)$$

### 1.1 Technical Preliminaries

We first define some notations will be used specifically in this section. Let  $\mathbf{z}_{ij} = \mathbf{A}_{ij} \mathbf{x}_j \in \mathbb{R}^{m_i \times 1}$ ,  $\mathbf{z}_i^r = [\mathbf{z}_{i1}^T, \dots, \mathbf{z}_{iJ}^T]^T \in \mathbb{R}^{m_i J \times 1}$  and  $\mathbf{z} = [(\mathbf{z}_1^r)^T, \dots, (\mathbf{z}_I^r)^T]^T \in \mathbb{R}^{Jm \times 1}$ . Let  $\mathbf{W}_i \in \mathbb{R}^{Jm_i \times m_i}$  be a column vector of  $\mathbf{W}_{ij} \in \mathbb{R}^{m_i \times m_i}$  where

$$\mathbf{W}_{ij} = \begin{cases} \mathbf{I}_{m_i}, & \text{if } \mathbf{A}_{ij} \neq \mathbf{0}, \\ \mathbf{0} & \text{otherwise.} \end{cases} \quad (6)$$

Define  $\mathbf{Q} \in \mathbb{R}^{Jm \times Jm}$  as a diagonal matrix of  $\mathbf{Q}_i \in \mathbb{R}^{Jm_i \times Jm_i}$  and

$$\mathbf{Q} = \operatorname{diag}([\mathbf{Q}_1, \dots, \mathbf{Q}_I]), \quad \mathbf{Q}_i = \operatorname{diag}(\mathbf{W}_i) - \frac{1}{d_i} \mathbf{W}_i \mathbf{W}_i^T. \quad (7)$$

Therefore, for an optimal solution  $\mathbf{x}^*$  satisfying  $\mathbf{A}\mathbf{x}^* = \mathbf{a}$ , we have

$$\begin{aligned} \|\mathbf{z}^t - \mathbf{z}^*\|_{\mathbf{Q}}^2 &= \sum_{i=1}^I \|\mathbf{z}_i^t - \mathbf{z}_i^*\|_{\mathbf{Q}_i}^2 = \sum_{i=1}^I \|\mathbf{z}_i^t - \mathbf{z}_i^*\|_{\operatorname{diag}(\mathbf{W}_i) - \frac{1}{d_i} \mathbf{W}_i \mathbf{W}_i^T}^2 \\ &= \sum_{i=1}^I \left[ \sum_{j \in \mathcal{N}(i)} \|\mathbf{z}_{ij}^t - \mathbf{z}_{ij}^*\|_2^2 - \frac{1}{d_i} \|\mathbf{W}_i^T (\mathbf{z}_i^t - \mathbf{z}_i^*)\|_2^2 \right] \end{aligned}$$

$$= \sum_{i=1}^I \left[ \|\mathbf{z}_i^t - \mathbf{z}_i^*\|_2^2 - \frac{1}{d_i} \|\mathbf{A}_i^r \mathbf{x}^t - \mathbf{a}_i\|_2^2 \right], \quad (8)$$

where the last equality uses  $\mathbf{w}_i^T \mathbf{z}_i^* = \mathbf{A}_i^r \mathbf{x}^* = \mathbf{a}_i$ .

In the following lemma, we prove that  $\mathbf{Q}_i$  is a positive semi-definite matrix. Thus,  $\mathbf{Q}$  is also positive semi-definite.

**Lemma 1**  $\mathbf{Q}_i$  is positive semi-definite.

*Proof:* As  $\mathbf{W}_{ij}$  is either an identity matrix or a zero matrix,  $\mathbf{W}_i$  has  $d_i$  nonzero entries. Removing the zero entries from  $\mathbf{W}_i$ , we have  $\tilde{\mathbf{W}}_i$  which only has  $d_i$  nonzero entries. Then,

$$\tilde{\mathbf{W}}_i = \begin{bmatrix} \mathbf{I}_{m_i} \\ \vdots \\ \mathbf{I}_{m_i} \end{bmatrix}, \text{diag}(\tilde{\mathbf{W}}_i) = \begin{bmatrix} \mathbf{I}_{m_i} & & \\ & \ddots & \\ & & \mathbf{I}_{m_i} \end{bmatrix}, \quad (9)$$

$\text{diag}(\mathbf{W}_i)$  is an identity matrix. Define  $\tilde{\mathbf{Q}}_i = \text{diag}(\tilde{\mathbf{W}}_i) - \frac{1}{d_i} \tilde{\mathbf{W}}_i \tilde{\mathbf{W}}_i^T$ . If  $\tilde{\mathbf{Q}}_i$  is positive semi-definite,  $\mathbf{Q}_i$  is positive semi-definite.

Denote  $\lambda_{\tilde{\mathbf{W}}_i}^{\max}$  as the largest eigenvalue of  $\tilde{\mathbf{W}}_i \tilde{\mathbf{W}}_i^T$ , which is equivalent to the largest eigenvalue of  $\tilde{\mathbf{W}}_i^T \tilde{\mathbf{W}}_i$ . Since  $\tilde{\mathbf{W}}_i^T \tilde{\mathbf{W}}_i = d_i \mathbf{I}_{m_i}$ , then  $\lambda_{\tilde{\mathbf{W}}_i}^{\max} = d_i$ . Then, for any  $\mathbf{v}$ ,

$$\|\mathbf{v}\|_{\tilde{\mathbf{W}}_i \tilde{\mathbf{W}}_i^T}^2 \leq \lambda_{\tilde{\mathbf{W}}_i}^{\max} \|\mathbf{v}\|_2^2 = d_i \|\mathbf{v}\|_2^2. \quad (10)$$

Thus,

$$\|\mathbf{v}\|_{\mathbf{Q}_i}^2 = \|\mathbf{v}\|_{\text{diag}(\tilde{\mathbf{W}}_i) - \frac{1}{d_i} \tilde{\mathbf{W}}_i \tilde{\mathbf{W}}_i^T}^2 = \|\mathbf{v}\|_2^2 - \frac{1}{d_i} \|\mathbf{v}\|_{\tilde{\mathbf{W}}_i \tilde{\mathbf{W}}_i^T}^2 \geq 0, \quad (11)$$

which completes the proof.  $\blacksquare$

Let  $\mathbf{W}_i^t \in \mathbb{R}^{Jm_i \times m_i}$  be a column vector of  $\mathbf{W}_{ijt} \in \mathbb{R}^{m_i \times m_i}$  where

$$\mathbf{W}_{ijt} = \begin{cases} \mathbf{I}_{m_i}, & \text{if } \mathbf{A}_{ijt} \neq \mathbf{0} \text{ and } j_t \in \mathbb{I}_t, \\ \mathbf{0} & \text{otherwise.} \end{cases} \quad (12)$$

Define  $\mathbf{P}_t \in \mathbb{R}^{Jm \times Jm}$  as a diagonal matrix of  $\mathbf{P}_i^t \in \mathbb{R}^{Jm_i \times Jm_i}$  and

$$\mathbf{P}_t = \text{diag}[\mathbf{P}_1^t, \dots, \mathbf{P}_I^t], \mathbf{P}_i^t = \text{diag}(\mathbf{W}_i^t) - \frac{1}{\tilde{K}_i} \mathbf{W}_i^t (\mathbf{W}_i^t)^T. \quad (13)$$

where  $\tilde{K}_i = \min\{K, d_i\} \geq \min\{|\mathbb{I}_t \cap \mathcal{N}_i|, d_i\}$ . Using similar arguments in Lemma 1, we can show  $\mathbf{P}_t$  is positive semi-definite. Therefore,

$$\begin{aligned} \|\mathbf{z}^{t+1} - \mathbf{z}^t\|_{\mathbf{P}_t}^2 &= \sum_{i=1}^I \|\mathbf{z}_i^{t+1} - \mathbf{z}_i^t\|_{\mathbf{P}_i^t}^2 = \sum_{i=1}^I \|\mathbf{z}_i^{t+1} - \mathbf{z}_i^t\|_{\text{diag}(\mathbf{W}_i^t) - \frac{1}{\tilde{K}_i} \mathbf{W}_i^t (\mathbf{W}_i^t)^T}^2 \\ &= \sum_{i=1}^I \left[ \sum_{j_t \in \mathbb{I}_t} \|\mathbf{z}_{ijt}^{t+1} - \mathbf{z}_{ijt}^t\|_2^2 - \frac{1}{\tilde{K}_i} \|(\mathbf{w}_i^t)^T (\mathbf{z}_i^{t+1} - \mathbf{z}_i^t)\|_2^2 \right] \end{aligned}$$

$$= \sum_{i=1}^I \left[ \|\mathbf{z}_i^{t+1} - \mathbf{z}_i^t\|_2^2 - \frac{1}{\tilde{K}_i} \|\mathbf{A}_i^r (\mathbf{x}^{t+1} - \mathbf{x}^t)\|_2^2 \right]. \quad (14)$$

In PDMM, an index set  $\mathbb{I}_t$  is randomly chosen. Conditioned on  $\mathbf{x}^t$ ,  $\mathbf{x}^{t+1}$  and  $\mathbf{y}^{t+1}$  depend on  $\mathbb{I}_t$ .  $\mathbf{P}_t$  depends on  $\mathbb{I}_t$ .  $\mathbf{x}^t, \mathbf{y}^t$  are independent of  $\mathbb{I}_t$ .  $\mathbf{x}^t$  depends on a sequence of observed realization of random variable

$$\xi_{t-1} = \{\mathbb{I}_1, \mathbb{I}_2, \dots, \mathbb{I}_{t-1}\}. \quad (15)$$

As we do not assume that  $f_{j_t}$  is differentiable, we use the subgradient of  $f_{j_t}$ . In particular, if  $f_{j_t}$  is differentiable, the subgradient of  $f_{j_t}$  becomes the gradient, i.e.,  $\nabla f_{j_t}(\mathbf{x}_{j_t})$ . PDMM (3)-(5) has the following lemma.

**Lemma 2** *Let  $\{\mathbf{x}_{j_t}^t, \mathbf{y}_i^t\}$  be generated by PDMM (3)-(5). Assume  $\tau_i > 0$  and  $\nu_i \geq 0$ . We have*

$$\begin{aligned} \sum_{j_t \in \mathbb{I}_t} f_{j_t}(\mathbf{x}_{j_t}^{t+1}) - f_{j_t}(\mathbf{x}_{j_t}^*) &\leq -\frac{K}{J} \sum_{i=1}^I \left\{ \langle \mathbf{y}_i^t, \mathbf{A}_i^r \mathbf{x}^t - \mathbf{a}_i \rangle - \frac{\tau_i \rho}{2} \|\mathbf{A}_i^r \mathbf{x}^t - \mathbf{a}_i\|_2^2 \right\} \\ &\quad - \sum_{j_t \in \mathbb{I}_t} \langle \hat{\mathbf{y}}^t + \rho(\mathbf{A} \mathbf{x}^t - \mathbf{a}), \mathbf{A}_{j_t}^c (\mathbf{x}_{j_t}^t - \mathbf{x}_{j_t}^*) \rangle + \frac{K}{J} \langle \hat{\mathbf{y}}^t + \rho(\mathbf{A} \mathbf{x}^t - \mathbf{a}), \mathbf{A} \mathbf{x}^t - \mathbf{a} \rangle \\ &\quad + \sum_{i=1}^I \left\{ \langle \mathbf{y}_i^t, \mathbf{A}_i^r \mathbf{x}^t - \mathbf{a}_i \rangle - \frac{\tau_i \rho}{2} \|\mathbf{A}_i^r \mathbf{x}^t - \mathbf{a}_i\|_2^2 \right\} - \sum_{i=1}^I \left\{ \langle \mathbf{y}_i^{t+1}, \mathbf{A}_i^r \mathbf{x}^{t+1} - \mathbf{a}_i \rangle - \frac{\tau_i \rho}{2} \|\mathbf{A}_i^r \mathbf{x}^{t+1} - \mathbf{a}_i\|_2^2 \right\} \\ &\quad + \sum_{i=1}^I (\|\mathbf{z}^* - \mathbf{z}^t\|_Q^2 - \|\mathbf{z}^* - \mathbf{z}^{t+1}\|_Q^2 - \|\mathbf{z}^{t+1} - \mathbf{z}^t\|_{\mathbf{P}_t}^2) \\ &\quad + \sum_{j_t \in \mathbb{I}_t} \eta_{j_t} (B_{\phi_{j_t}}(\mathbf{x}_{j_t}^*, \mathbf{x}_{j_t}^t) - B_{\phi_{j_t}}(\mathbf{x}_{j_t}^*, \mathbf{x}_{j_t}^{t+1}) - B_{\phi_{j_t}}(\mathbf{x}_{j_t}^{t+1}, \mathbf{x}_{j_t}^t)) \\ &\quad + \frac{\rho}{2} \sum_{i=1}^I \left\{ \left[ (1 - \frac{2K}{J})(1 - \nu_i) + (1 - \frac{K}{J})\tau_i + \frac{1}{d_i} \right] \|\mathbf{A}_i^r \mathbf{x}^t - \mathbf{a}_i\|_2^2 - (1 - \nu_i - \tau_i + \frac{1}{d_i}) \|\mathbf{A}_i^r \mathbf{x}^{t+1} - \mathbf{a}_i\|_2^2 \right. \\ &\quad \left. + (1 - \nu_i - \frac{1}{\tilde{K}_i}) \|\mathbf{A}_i^r (\mathbf{x}^{t+1} - \mathbf{x}^t)\|_2^2 \right\}. \quad (16) \end{aligned}$$

*Proof:* Let  $\partial f_{j_t}(\mathbf{x}_{j_t}^{t+1})$  be the subdifferential of  $f_{j_t}$  at  $\mathbf{x}_{j_t}^{t+1}$ . Let  $f'_{j_t}(\mathbf{x}_{j_t}^{t+1}) \in \partial f_{j_t}(\mathbf{x}_{j_t}^{t+1})$  where  $\mathbf{x}_{j_t}^{t+1} \in \mathcal{X}_j$ . For any  $\mathbf{x}_{j_t}^* \in \mathcal{X}_j$ , the optimality of the  $\mathbf{x}_{j_t}$  update (3) is

$$\langle f'_{j_t}(\mathbf{x}_{j_t}^{t+1}) + (\mathbf{A}_{j_t}^c)^T [\hat{\mathbf{y}}^t + \rho(\mathbf{A}_{j_t}^c \mathbf{x}_{j_t}^{t+1} + \sum_{k \neq j_t} \mathbf{A}_k^c \mathbf{x}_k^t - \mathbf{a})] + \eta_{j_t} (\nabla \phi_{j_t}(\mathbf{x}_{j_t}^{t+1}) - \nabla \phi_{j_t}(\mathbf{x}_{j_t}^t)), \mathbf{x}_{j_t}^{t+1} - \mathbf{x}_{j_t}^* \rangle \leq 0, \quad (17)$$

Using (5) and rearranging the terms yield

$$\begin{aligned} &\langle f_{j_t}(\mathbf{x}_{j_t}^{t+1}), \mathbf{x}_{j_t}^{t+1} - \mathbf{x}_{j_t}^* \rangle \\ &\leq \langle -(\mathbf{A}_{j_t}^c)^T [\hat{\mathbf{y}}^t + \rho(\mathbf{A} \mathbf{x}^t - \mathbf{a}) + \rho \mathbf{A}_{j_t}^c (\mathbf{x}_{j_t}^{t+1} - \mathbf{x}_{j_t}^t)] + \eta_{j_t} (\nabla \phi_{j_t}(\mathbf{x}_{j_t}^{t+1}) - \nabla \phi_{j_t}(\mathbf{x}_{j_t}^t)), \mathbf{x}_{j_t}^{t+1} - \mathbf{x}_{j_t}^* \rangle. \end{aligned} \quad (18)$$

Using the convexity of  $f_{j_t}$ , we have

$$\begin{aligned}
& f_{j_t}(\mathbf{x}_{j_t}^{t+1}) - f_{j_t}(\mathbf{x}_{j_t}^*) \leq -\langle \hat{\mathbf{y}}^t + \rho(\mathbf{A}\mathbf{x}^t - \mathbf{a}), \mathbf{A}_{j_t}^c(\mathbf{x}_{j_t}^{t+1} - \mathbf{x}_{j_t}^*) \rangle \\
& - \rho \langle \mathbf{A}_{j_t}^c(\mathbf{x}_{j_t}^{t+1} - \mathbf{x}_{j_t}^*), \mathbf{A}_{j_t}^c(\mathbf{x}_{j_t}^{t+1} - \mathbf{x}_{j_t}^*) \rangle - \eta_{j_t} \langle \nabla \phi_{j_t}(\mathbf{x}_{j_t}^{t+1}) - \nabla \phi_{j_t}(\mathbf{x}_{j_t}^t), \mathbf{x}_{j_t}^{t+1} - \mathbf{x}_{j_t}^* \rangle \\
& = -\langle \hat{\mathbf{y}}^t + \rho(\mathbf{A}\mathbf{x}^t - \mathbf{a}), \mathbf{A}_{j_t}^c(\mathbf{x}_{j_t}^t - \mathbf{x}_{j_t}^*) \rangle - \langle \hat{\mathbf{y}}^t + \rho(\mathbf{A}\mathbf{x}^t - \mathbf{a}), \mathbf{A}_{j_t}^c(\mathbf{x}_{j_t}^{t+1} - \mathbf{x}_{j_t}^t) \rangle \\
& - \rho \sum_{i=1}^I \langle \mathbf{A}_{ij_t}(\mathbf{x}_{j_t}^{t+1} - \mathbf{x}_{j_t}^t), \mathbf{A}_{ij_t}(\mathbf{x}_{j_t}^{t+1} - \mathbf{x}_{j_t}^*) \rangle \\
& + \eta_{j_t} \left( B_{\phi_{j_t}}(\mathbf{x}_{j_t}^*, \mathbf{x}_{j_t}^t) - B_{\phi_{j_t}}(\mathbf{x}_{j_t}^*, \mathbf{x}_{j_t}^{t+1}) - B_{\phi_{j_t}}(\mathbf{x}_{j_t}^{t+1}, \mathbf{x}_{j_t}^t) \right). \tag{19}
\end{aligned}$$

Summing over  $j_t \in \mathbb{I}_t$ , we have

$$\begin{aligned}
& \sum_{j_t \in \mathbb{I}_t} f_{j_t}(\mathbf{x}_{j_t}^{t+1}) - f_{j_t}(\mathbf{x}_{j_t}^*) \\
& \leq - \sum_{j_t \in \mathbb{I}_t} \langle \hat{\mathbf{y}}^t + \rho(\mathbf{A}\mathbf{x}^t - \mathbf{a}), \mathbf{A}_{j_t}^c(\mathbf{x}_{j_t}^t - \mathbf{x}_{j_t}^*) \rangle - \langle \hat{\mathbf{y}}^t + \rho(\mathbf{A}\mathbf{x}^t - \mathbf{a}), \sum_{j_t \in \mathbb{I}_t} \mathbf{A}_{j_t}^c(\mathbf{x}_{j_t}^{t+1} - \mathbf{x}_{j_t}^t) \rangle \\
& - \rho \sum_{i=1}^I \sum_{j_t \in \mathbb{I}_t} \langle \mathbf{A}_{ij_t}(\mathbf{x}_{j_t}^{t+1} - \mathbf{x}_{j_t}^t), \mathbf{A}_{ij_t}(\mathbf{x}_{j_t}^{t+1} - \mathbf{x}_{j_t}^*) \rangle \\
& + \sum_{j_t \in \mathbb{I}_t} \eta_{j_t} \left( B_{\phi_{j_t}}(\mathbf{x}_{j_t}^*, \mathbf{x}_{j_t}^t) - B_{\phi_{j_t}}(\mathbf{x}_{j_t}^*, \mathbf{x}_{j_t}^{t+1}) - B_{\phi_{j_t}}(\mathbf{x}_{j_t}^{t+1}, \mathbf{x}_{j_t}^t) \right) \\
& = - \sum_{j_t \in \mathbb{I}_t} \langle \hat{\mathbf{y}}^t + \rho(\mathbf{A}\mathbf{x}^t - \mathbf{a}), \mathbf{A}_{j_t}^c(\mathbf{x}_{j_t}^t - \mathbf{x}_{j_t}^*) \rangle + \frac{K}{J} \langle \hat{\mathbf{y}}^t + \rho(\mathbf{A}\mathbf{x}^t - \mathbf{a}), \mathbf{A}\mathbf{x}^t - \mathbf{a} \rangle \\
& - \underbrace{\frac{K}{J} \langle \hat{\mathbf{y}}^t + \rho(\mathbf{A}\mathbf{x}^t - \mathbf{a}), \mathbf{A}\mathbf{x}^t - \mathbf{a} \rangle - \langle \hat{\mathbf{y}}^t + \rho(\mathbf{A}\mathbf{x}^t - \mathbf{a}), \mathbf{A}(\mathbf{x}^{t+1} - \mathbf{x}^t) \rangle}_{H_1} \\
& + \underbrace{\frac{\rho}{2} \sum_{i=1}^I \sum_{j_t \in \mathbb{I}_t} (\|\mathbf{A}_{ij_t}(\mathbf{x}_{j_t}^* - \mathbf{x}_{j_t}^t)\|_2^2 - \|\mathbf{A}_{ij_t}(\mathbf{x}_{j_t}^* - \mathbf{x}_{j_t}^{t+1})\|_2^2 - \|\mathbf{A}_{ij_t}(\mathbf{x}_{j_t}^{t+1} - \mathbf{x}_{j_t}^t)\|_2^2)}_{H_2} \\
& + \sum_{j_t \in \mathbb{I}_t} \eta_{j_t} \left( B_{\phi_{j_t}}(\mathbf{x}_{j_t}^*, \mathbf{x}_{j_t}^t) - B_{\phi_{j_t}}(\mathbf{x}_{j_t}^*, \mathbf{x}_{j_t}^{t+1}) - B_{\phi_{j_t}}(\mathbf{x}_{j_t}^{t+1}, \mathbf{x}_{j_t}^t) \right). \tag{20}
\end{aligned}$$

$H_1$  in (20) can be rewritten as

$$H_1 = -\langle \hat{\mathbf{y}}^t + \rho(\mathbf{A}\mathbf{x}^t - \mathbf{a}), \mathbf{A}\mathbf{x}^{t+1} - \mathbf{a} \rangle + (1 - \frac{K}{J}) \langle \hat{\mathbf{y}}^t + \rho(\mathbf{A}\mathbf{x}^t - \mathbf{a}), \mathbf{A}\mathbf{x}^t - \mathbf{a} \rangle. \tag{21}$$

The first term of (21) is equivalent to

$$\begin{aligned}
& - \langle \hat{\mathbf{y}}^t + \rho(\mathbf{A}\mathbf{x}^t - \mathbf{a}), \mathbf{A}\mathbf{x}^{t+1} - \mathbf{a} \rangle \\
& = - \sum_{i=1}^I \langle \hat{\mathbf{y}}_i^t + \rho(\mathbf{A}_i^r \mathbf{x}^t - \mathbf{a}_i), \mathbf{A}_i^r \mathbf{x}^{t+1} - \mathbf{a}_i \rangle
\end{aligned}$$

$$\begin{aligned}
&= - \sum_{i=1}^I \langle \mathbf{y}_i^t + (1 - \nu_i) \rho(\mathbf{A}_i^r \mathbf{x}^t - \mathbf{a}_i), \mathbf{A}_i^r \mathbf{x}^{t+1} - \mathbf{a}_i \rangle \\
&= - \sum_{i=1}^I \left\{ \langle \mathbf{y}_i^{t+1} - \tau_i \rho(\mathbf{A}_i^r \mathbf{x}^{t+1} - \mathbf{a}_i), \mathbf{A}_i^r \mathbf{x}^{t+1} - \mathbf{a}_i \rangle + (1 - \nu_i) \rho \langle \mathbf{A}_i^r \mathbf{x}^t - \mathbf{a}_i, \mathbf{A}_i^r \mathbf{x}^{t+1} - \mathbf{a}_i \rangle \right\} \\
&= - \sum_{i=1}^I \left\{ \langle \mathbf{y}_i^{t+1}, \mathbf{A}_i^r \mathbf{x}^{t+1} - \mathbf{a}_i \rangle - \tau_i \rho \|\mathbf{A}_i^r \mathbf{x}^{t+1} - \mathbf{a}_i\|_2^2 \right. \\
&\quad \left. - \frac{(1 - \nu_i) \rho}{2} (\|\mathbf{A}_i^r (\mathbf{x}^{t+1} - \mathbf{x}^t)\|_2^2 - \|\mathbf{A}_i^r \mathbf{x}^t - \mathbf{a}_i\|_2^2 - \|\mathbf{A}_i^r \mathbf{x}^{t+1} - \mathbf{a}_i\|_2^2) \right\} \\
&= - \sum_{i=1}^I \left\{ \langle \mathbf{y}_i^{t+1}, \mathbf{A}_i^r \mathbf{x}^{t+1} - \mathbf{a}_i \rangle - \frac{\tau_i \rho}{2} \|\mathbf{A}_i^r \mathbf{x}^{t+1} - \mathbf{a}_i\|_2^2 \right\} \\
&\quad + \sum_{i=1}^I \left\{ \frac{(1 - \nu_i) \rho}{2} (\|\mathbf{A}_i^r (\mathbf{x}^{t+1} - \mathbf{x}^t)\|_2^2 - \|\mathbf{A}_i^r \mathbf{x}^t - \mathbf{a}_i\|_2^2) - \frac{(1 - \nu_i - \tau_i) \rho}{2} \|\mathbf{A}_i^r \mathbf{x}^{t+1} - \mathbf{a}_i\|_2^2 \right\}. \quad (22)
\end{aligned}$$

The second term of (21) is equivalent to

$$\begin{aligned}
&(1 - \frac{K}{J}) \langle \hat{\mathbf{y}}^t + \rho(\mathbf{A} \mathbf{x}^t - \mathbf{a}), \mathbf{A} \mathbf{x}^t - \mathbf{a} \rangle \\
&= (1 - \frac{K}{J}) \sum_{i=1}^I \langle \hat{\mathbf{y}}_i^t + \rho(\mathbf{A}_i^r \mathbf{x}^t - \mathbf{a}_i), \mathbf{A}_i^r \mathbf{x}^t - \mathbf{a}_i \rangle \\
&= (1 - \frac{K}{J}) \sum_{i=1}^I \langle \mathbf{y}_i^t + (1 - \nu_i) \rho(\mathbf{A}_i^r \mathbf{x}^t - \mathbf{a}_i), \mathbf{A}_i^r \mathbf{x}^t - \mathbf{a}_i \rangle \\
&= (1 - \frac{K}{J}) \sum_{i=1}^I \left\{ \langle \mathbf{y}_i^t, \mathbf{A}_i^r \mathbf{x}^t - \mathbf{a}_i \rangle - \frac{\tau_i \rho}{2} \|\mathbf{A}_i^r \mathbf{x}^t - \mathbf{a}_i\|_2^2 \right\} + (1 - \frac{K}{J}) \sum_{i=1}^I (1 - \nu_i + \frac{\tau_i}{2}) \rho \|\mathbf{A}_i^r \mathbf{x}^t - \mathbf{a}_i\|_2^2. \quad (23)
\end{aligned}$$

$H_2$  in (20) is equivalent to

$$\begin{aligned}
H_2 &= \frac{\rho}{2} \sum_{i=1}^I \sum_{j_t \in \mathbb{I}_t} (\|\mathbf{z}_{ij_t}^* - \mathbf{z}_{ij_t}^t\|_2^2 - \|\mathbf{z}_{ij_t}^* - \mathbf{z}_{ij_t}^{t+1}\|_2^2 - \|\mathbf{z}_{ij_t}^{t+1} - \mathbf{z}_{ij_t}^t\|_2^2) \\
&= \frac{\rho}{2} \sum_{i=1}^I (\|\mathbf{z}_i^* - \mathbf{z}_i^t\|_2^2 - \|\mathbf{z}_i^* - \mathbf{z}_i^{t+1}\|_2^2 - \|\mathbf{z}_i^{t+1} - \mathbf{z}_i^t\|_2^2) \\
&= \frac{\rho}{2} (\|\mathbf{z}^* - \mathbf{z}^t\|_{\mathbf{Q}}^2 - \|\mathbf{z}^* - \mathbf{z}^{t+1}\|_{\mathbf{Q}}^2 - \|\mathbf{z}^{t+1} - \mathbf{z}^t\|_{\mathbf{P}_t}^2) \\
&\quad + \frac{\rho}{2} \sum_{i=1}^I \frac{1}{d_i} (\|\mathbf{A}_i^r \mathbf{x}^t - \mathbf{a}_i\|_2^2 - \|\mathbf{A}_i^r \mathbf{x}^{t+1} - \mathbf{a}_i\|_2^2) - \frac{1}{\tilde{K}_i} \|\mathbf{A}_i^r (\mathbf{x}^{t+1} - \mathbf{x}^t)\|_2^2. \quad (24)
\end{aligned}$$

where the last equality uses the definition of  $\mathbf{Q}$  in (7) and  $\mathbf{P}_t$  (13), and  $\tilde{K}_i = \min\{K, d_i\}$ . Combining the results of (21)-(24) gives

$$H_1 + H_2 = - \sum_{i=1}^I \left\{ \langle \mathbf{y}_i^{t+1}, \mathbf{A}_i^r \mathbf{x}^{t+1} - \mathbf{a}_i \rangle - \frac{\tau_i \rho}{2} \|\mathbf{A}_i^r \mathbf{x}^{t+1} - \mathbf{a}_i\|_2^2 \right\}$$

$$\begin{aligned}
& + \sum_{i=1}^I \left\{ \frac{(1-\nu_i)\rho}{2} (\|\mathbf{A}_i^r(\mathbf{x}^{t+1} - \mathbf{x}^t)\|_2^2 - \|\mathbf{A}_i^r \mathbf{x}^t - \mathbf{a}_i\|_2^2) - \frac{(1-\nu_i-\tau_i)\rho}{2} \|\mathbf{A}_i^r \mathbf{x}^{t+1} - \mathbf{a}_i\|_2^2 \right\} \\
& + (1 - \frac{K}{J}) \sum_{i=1}^I \left\{ \langle \mathbf{y}_i^t, \mathbf{A}_i^r \mathbf{x}^t - \mathbf{a}_i \rangle - \frac{\tau_i \rho}{2} \|\mathbf{A}_i^r \mathbf{x}^t - \mathbf{a}_i\|_2^2 \right\} + (1 - \frac{K}{J}) \sum_{i=1}^I (1 - \nu_i + \frac{\tau_i}{2}) \rho \|\mathbf{A}_i^r \mathbf{x}^t - \mathbf{a}_i\|_2^2 \\
& + \frac{\rho}{2} (\|\mathbf{z}^* - \mathbf{z}^t\|_{\mathbf{Q}}^2 - \|\mathbf{z}^* - \mathbf{z}^{t+1}\|_{\mathbf{Q}}^2 - \|\mathbf{z}^{t+1} - \mathbf{z}^t\|_{\mathbf{P}_t}^2) \\
& + \frac{\rho}{2} \sum_{i=1}^I \frac{1}{d_i} (\|\mathbf{A}_i^r \mathbf{x}^t - \mathbf{a}_i\|_2^2 - \|\mathbf{A}_i^r \mathbf{x}^{t+1} - \mathbf{a}_i\|_2^2) - \frac{1}{\tilde{K}_i} \|\mathbf{A}_i^r(\mathbf{x}^{t+1} - \mathbf{x}^t)\|_2^2 \\
& = -\frac{K}{J} \sum_{i=1}^I \left\{ \langle \mathbf{y}_i^t, \mathbf{A}_i^r \mathbf{x}^t - \mathbf{a}_i \rangle - \frac{\tau_i \rho}{2} \|\mathbf{A}_i^r \mathbf{x}^t - \mathbf{a}_i\|_2^2 \right\} \\
& + \sum_{i=1}^I \left\{ \langle \mathbf{y}_i^t, \mathbf{A}_i^r \mathbf{x}^t - \mathbf{a}_i \rangle - \frac{\tau_i \rho}{2} \|\mathbf{A}_i^r \mathbf{x}^t - \mathbf{a}_i\|_2^2 \right\} - \sum_{i=1}^I \left\{ \langle \mathbf{y}_i^{t+1}, \mathbf{A}_i^r \mathbf{x}^{t+1} - \mathbf{a}_i \rangle - \frac{\tau_i \rho}{2} \|\mathbf{A}_i^r \mathbf{x}^{t+1} - \mathbf{a}_i\|_2^2 \right\} \\
& + \frac{\rho}{2} (\|\mathbf{z}^* - \mathbf{z}^t\|_{\mathbf{Q}}^2 - \|\mathbf{z}^* - \mathbf{z}^{t+1}\|_{\mathbf{Q}}^2 - \|\mathbf{z}^{t+1} - \mathbf{z}^t\|_{\mathbf{P}_t}^2) \\
& + \frac{\rho}{2} \sum_{i=1}^I \left\{ [(1 - \frac{2K}{J})(1 - \nu_i) + (1 - \frac{K}{J})\tau_i + \frac{1}{d_i}] \|\mathbf{A}_i^r \mathbf{x}^t - \mathbf{a}_i\|_2^2 - (1 - \nu_i - \tau_i + \frac{1}{d_i}) \|\mathbf{A}_i^r \mathbf{x}^{t+1} - \mathbf{a}_i\|_2^2 \right. \\
& \left. + (1 - \nu_i - \frac{1}{\tilde{K}_i}) \|\mathbf{A}_i^r(\mathbf{x}^{t+1} - \mathbf{x}^t)\|_2^2 \right\}. \tag{25}
\end{aligned}$$

Plugging back into (20) completes the proof.  $\blacksquare$

**Lemma 3** Let  $\{\mathbf{x}_{j_t}^t, \mathbf{y}_i^t\}$  be generated by PDMM (3)-(5). Assume  $\tau_i > 0$  and  $\nu_i \geq 0$ . We have

$$\begin{aligned}
& \sum_{j_t \in \mathbb{I}_t} f_{j_t}(\mathbf{x}_{j_t}^{t+1}) - f_{j_t}(\mathbf{x}_{j_t}^*) \leq -\frac{K}{J} \sum_{i=1}^I \left\{ \langle \mathbf{y}_i^t, \mathbf{A}_i^r \mathbf{x}^t - \mathbf{a}_i \rangle - \frac{\tau_i \rho}{2} \|\mathbf{A}_i^r \mathbf{x}^t - \mathbf{a}_i\|_2^2 \right\} \\
& - \sum_{j_t \in \mathbb{I}_t} \langle \hat{\mathbf{y}}^t + \rho(\mathbf{A}\mathbf{x}^t - \mathbf{a}), \mathbf{A}_{j_t}^c(\mathbf{x}_{j_t}^t - \mathbf{x}_{j_t}^*) \rangle + \frac{K}{J} \langle \hat{\mathbf{y}}^t + \rho(\mathbf{A}\mathbf{x}^t - \mathbf{a}), \mathbf{A}\mathbf{x}^t - \mathbf{a} \rangle \\
& + \sum_{i=1}^I \left\{ \langle \mathbf{y}_i^t, \mathbf{A}_i^r \mathbf{x}^t - \mathbf{a}_i \rangle - \frac{\tau_i \rho}{2} \|\mathbf{A}_i^r \mathbf{x}^t - \mathbf{a}_i\|_2^2 \right\} - \sum_{i=1}^I \left\{ \langle \mathbf{y}_i^{t+1}, \mathbf{A}_i^r \mathbf{x}^{t+1} - \mathbf{a}_i \rangle - \frac{\tau_i \rho}{2} \|\mathbf{A}_i^r \mathbf{x}^{t+1} - \mathbf{a}_i\|_2^2 \right\} \\
& + \|\mathbf{z}^* - \mathbf{z}^t\|_{\mathbf{Q}}^2 - \|\mathbf{z}^* - \mathbf{z}^{t+1}\|_{\mathbf{Q}}^2 - \|\mathbf{z}^{t+1} - \mathbf{z}^t\|_{\mathbf{P}_t}^2 \\
& + \boldsymbol{\eta}^T (B_\phi(\mathbf{x}^*, \mathbf{x}^t) - B_\phi(\mathbf{x}^*, \mathbf{x}^{t+1}) - B_\phi(\mathbf{x}^{t+1}, \mathbf{x}^t)) \\
& + \frac{\rho}{2} \sum_{i=1}^I [\gamma_i (\|\mathbf{A}_i^r \mathbf{x}^t - \mathbf{a}_i\|_2^2 - \|\mathbf{A}_i^r \mathbf{x}^{t+1} - \mathbf{a}_i\|_2^2) - \beta_i \|\mathbf{A}_i^r \mathbf{x}^{t+1} - \mathbf{a}_i\|_2^2]. \tag{26}
\end{aligned}$$

where  $\boldsymbol{\eta}^T = [\eta_1, \dots, \eta_J]$ .  $\tau_i > 0, \nu_i \geq 0, \gamma_i \geq 0$  and  $\beta_i \geq 0$  satisfy the following conditions:

$$\nu_i \in (\max\{0, 1 - \frac{2J}{\tilde{K}_i(2J - K)}\}, 1 - \frac{1}{\tilde{K}_i}], \tag{27}$$

$$\tau_i \leq \frac{J}{2J-K} \left[ \frac{4}{\tilde{K}_i} - \left(4 - \frac{2K}{J}\right)(1 - \nu_i) \right] \leq \frac{2K}{\tilde{K}_i(2J-K)}, \quad (28)$$

$$\gamma_i = \left(3 - \frac{2K}{J}\right)(1 - \nu_i) + \left(1 - \frac{K}{J}\right)\tau_i + \frac{1}{d_i} - \frac{2}{\tilde{K}_i}, \quad (29)$$

$$\beta_i = \frac{4}{\tilde{K}_i} - \left(2 - \frac{K}{J}\right)[2(1 - \nu_i) + \tau_i]. \quad (30)$$

*Proof:* In (16), denote

$$H_3 = \left[\left(1 - \frac{2K}{J}\right)(1 - \nu_i) + \left(1 - \frac{K}{J}\right)\tau_i + \frac{1}{d_i}\right] \|\mathbf{A}_i^r \mathbf{x}^t - \mathbf{a}_i\|_2^2 - \left(1 - \nu_i - \tau_i + \frac{1}{d_i}\right) \|\mathbf{A}_i^r \mathbf{x}^{t+1} - \mathbf{a}_i\|_2^2, \quad (31)$$

$$H_4 = \left(1 - \nu_i - \frac{1}{\tilde{K}_i}\right) \|\mathbf{A}_i^r (\mathbf{x}^{t+1} - \mathbf{x}^t)\|_2^2. \quad (32)$$

Our goal is to eliminate  $H_4$  so that

$$H_3 + H_4 = \gamma_i (\|\mathbf{A}_i^r \mathbf{x}^t - \mathbf{a}_i\|_2^2 - \|\mathbf{A}_i^r \mathbf{x}^{t+1} - \mathbf{a}_i\|_2^2) - \beta_i \|\mathbf{A}_i^r \mathbf{x}^{t+1} - \mathbf{a}_i\|_2^2, \quad (33)$$

where  $\gamma_i \geq 0$  and  $\beta_i \geq 0$ .

We want to choose a large  $\tau_i$  and a small  $\nu_i$ . Assume  $1 - \nu_i - \frac{1}{\tilde{K}_i} \geq 0$ , i.e.,  $\nu_i \leq 1 - \frac{1}{\tilde{K}_i}$ , we have

$$H_4 = \left(1 - \nu_i - \frac{1}{\tilde{K}_i}\right) \|\mathbf{A}_i^r (\mathbf{x}^{t+1} - \mathbf{x}^t)\|_2^2 \leq 2\left(1 - \nu_i - \frac{1}{\tilde{K}_i}\right) (\|\mathbf{A}_i^r \mathbf{x}^t - \mathbf{a}_i\|_2^2 + \|\mathbf{A}_i^r \mathbf{x}^{t+1} - \mathbf{a}_i\|_2^2). \quad (34)$$

Therefore, we have

$$\begin{aligned} H_3 + H_4 &\leq \left[\left(3 - \frac{2K}{J}\right)(1 - \nu_i) + \left(1 - \frac{K}{J}\right)\tau_i + \frac{1}{d_i} - \frac{2}{\tilde{K}_i}\right] \|\mathbf{A}_i^r \mathbf{x}^t - \mathbf{a}_i\|_2^2 + \left(1 - \nu_i + \tau_i - \frac{1}{d_i} - \frac{2}{\tilde{K}_i}\right) \|\mathbf{A}_i^r \mathbf{x}^{t+1} - \mathbf{a}_i\|_2^2 \\ &= \gamma_i (\|\mathbf{A}_i^r \mathbf{x}^t - \mathbf{a}_i\|_2^2 - \|\mathbf{A}_i^r \mathbf{x}^{t+1} - \mathbf{a}_i\|_2^2) - \beta_i \|\mathbf{A}_i^r \mathbf{x}^{t+1} - \mathbf{a}_i\|_2^2. \end{aligned} \quad (35)$$

where

$$\begin{aligned} \gamma_i &= \left(3 - \frac{2K}{J}\right)(1 - \nu_i) + \left(1 - \frac{K}{J}\right)\tau_i + \frac{1}{d_i} - \frac{2}{\tilde{K}_i} \\ &\geq \left(3 - \frac{2K}{J}\right)\frac{1}{\tilde{K}_i} + \left(1 - \frac{K}{J}\right)\tau_i + \frac{1}{d_i} - \frac{2}{\tilde{K}_i} \\ &= \left(1 - \frac{K}{J}\right)\frac{1}{\tilde{K}_i} - \frac{K}{J\tilde{K}_i} + \frac{1}{d_i} + \left(1 - \frac{K}{J}\right)\tau_i \geq 0. \end{aligned} \quad (36)$$

and

$$\beta_i = -(1 - \nu_i + \tau_i + \frac{1}{d_i} - \frac{2}{\tilde{K}_i} + \gamma_i) = \frac{4}{\tilde{K}_i} - \left(2 - \frac{K}{J}\right)[2(1 - \nu_i) + \tau_i]. \quad (37)$$

We also want  $\beta_i \geq 0$ , which can be reduced to

$$\tau_i \leq \frac{J}{2J-K} \left[ \frac{4}{\tilde{K}_i} - \left(4 - \frac{2K}{J}\right)(1 - \nu_i) \right] \quad (38)$$

$$\begin{aligned}
&\leq \frac{J}{2J-K} \left[ \frac{4}{\tilde{K}_i} - \left(4 - \frac{2K}{J}\right) \frac{1}{\tilde{K}_i} \right] \\
&= \frac{2K}{\tilde{K}_i(2J-K)}.
\end{aligned}$$

It also requires the RHS of (38) to be positive, leading to  $\nu_i > \max\{0, 1 - \frac{2J}{\tilde{K}_i(2J-K)}\}$ . Therefore,  $\nu_i \in (\max\{0, 1 - \frac{2J}{\tilde{K}_i(2J-K)}\}, 1 - \frac{1}{\tilde{K}_i}]$ .

Denote  $B_\phi = [B_{\phi_1}, \dots, B_{\phi_J}]^T$  as a column vector of the Bregman divergence on block coordinates of  $\mathbf{x}$ . Using  $\mathbf{x}^{t+1} = [\mathbf{x}_{j_t \in \mathbb{I}_t}^{t+1}, \mathbf{x}_{j_t \notin \mathbb{I}_t}^t]^T$ , we have  $B_{\phi_{j_t}}(\mathbf{x}_{j_t}^*, \mathbf{x}_{j_t}^t) - B_{\phi_{j_t}}(\mathbf{x}_{j_t}^*, \mathbf{x}_{j_t}^{t+1}) = B_\phi(\mathbf{x}^*, \mathbf{x}^t) - B_\phi(\mathbf{x}^*, \mathbf{x}^{t+1})$ ,  $B_{\phi_{j_t}}(\mathbf{x}_{j_t}^{t+1}, \mathbf{x}_{j_t}^t) = B_\phi(\mathbf{x}^{t+1}, \mathbf{x}^t)$ . Thus,

$$\begin{aligned}
&\sum_{j_t \in \mathbb{I}_t} \eta_{j_t} \left( B_{\phi_{j_t}}(\mathbf{x}_{j_t}^*, \mathbf{x}_{j_t}^t) - B_{\phi_{j_t}}(\mathbf{x}_{j_t}^*, \mathbf{x}_{j_t}^{t+1}) - B_{\phi_{j_t}}(\mathbf{x}_{j_t}^{t+1}, \mathbf{x}_{j_t}^t) \right) \\
&= \boldsymbol{\eta}^T (B_\phi(\mathbf{x}^*, \mathbf{x}^t) - B_\phi(\mathbf{x}^*, \mathbf{x}^{t+1}) - B_\phi(\mathbf{x}^{t+1}, \mathbf{x}^t)).
\end{aligned} \tag{39}$$

where  $\boldsymbol{\eta}^T = [\eta_1, \dots, \eta_J]$ . ■

**Lemma 4** Let  $\{\mathbf{x}_{j_t}^t, \mathbf{y}_{j_t}^t\}$  be generated by PDMM (3)-(5). Assume  $\tau_i > 0$  and  $\nu_i \geq 0$  satisfy the conditions in Lemma 3. We have

$$\begin{aligned}
f(\mathbf{x}^t) - f(\mathbf{x}^*) &\leq - \sum_{i=1}^I \left\{ \langle \mathbf{y}_i^t, \mathbf{A}_i^r \mathbf{x}^t - \mathbf{a}_i \rangle - \frac{\tau_i \rho}{2} \|\mathbf{A}_i^r \mathbf{x}^t - \mathbf{a}_i\|_2^2 \right\} \\
&+ \frac{J}{K} \left\{ \tilde{\mathcal{L}}_\rho(\mathbf{x}^t, \mathbf{y}^t) - \mathbb{E}_{\mathbb{I}_t} \tilde{\mathcal{L}}_\rho(\mathbf{x}^{t+1}, \mathbf{y}^{t+1}) - \frac{\rho}{2} \sum_{i=1}^I \beta_i \mathbb{E}_{\mathbb{I}_t} \|\mathbf{A}_i^r \mathbf{x}^{t+1} - \mathbf{a}_i\|_2^2 \right. \\
&+ \frac{\rho}{2} (\|\mathbf{z}^* - \mathbf{z}^t\|_{\mathbf{Q}}^2 - \mathbb{E}_{\mathbb{I}_t} \|\mathbf{z}^* - \mathbf{z}^{t+1}\|_{\mathbf{Q}}^2 - \mathbb{E}_{\mathbb{I}_t} \|\mathbf{z}^{t+1} - \mathbf{z}^t\|_{\mathbf{P}_t}^2) \\
&\left. + \boldsymbol{\eta}^T (B_\phi(\mathbf{x}^*, \mathbf{x}^t) - \mathbb{E}_{\mathbb{I}_t} B_\phi(\mathbf{x}^*, \mathbf{x}^{t+1}) - \mathbb{E}_{\mathbb{I}_t} B_\phi(\mathbf{x}^{t+1}, \mathbf{x}^t)) \right\}.
\end{aligned} \tag{40}$$

where  $\tilde{\mathcal{L}}_\rho$  is defined as follows:

$$\tilde{\mathcal{L}}_\rho(\mathbf{x}^t, \mathbf{y}^t) = f(\mathbf{x}^t) - f(\mathbf{x}^*) + \sum_{i=1}^I \left\{ \langle \mathbf{y}_i^t, \mathbf{A}_i^r \mathbf{x}^t - \mathbf{a}_i \rangle + \frac{(\gamma_i - \tau_i) \rho}{2} \|\mathbf{A}_i^r \mathbf{x}^t - \mathbf{a}_i\|_2^2 \right\}. \tag{41}$$

$\tau_i, \nu_i, \gamma_i, \beta_i$  and  $\boldsymbol{\eta}$  are defined in Lemma 3.

*Proof:* Using  $\mathbf{x}^{t+1} = [\mathbf{x}_{j_t \in \mathbb{I}_t}^{t+1}, \mathbf{x}_{j_t \notin \mathbb{I}_t}^t]^T$ , we have

$$f(\mathbf{x}^{t+1}) - f(\mathbf{x}^t) = \sum_{j_t \in \mathbb{I}_t} f_{j_t}(\mathbf{x}_{j_t}^{t+1}) - f_{j_t}(\mathbf{x}_{j_t}^t) = \sum_{j_t \in \mathbb{I}_t} [f_{j_t}(\mathbf{x}_{j_t}^{t+1}) - f_{j_t}(\mathbf{x}_{j_t}^*)] - \sum_{j_t \in \mathbb{I}_t} [f_{j_t}(\mathbf{x}_{j_t}^t) - f_{j_t}(\mathbf{x}_{j_t}^*)]. \tag{42}$$

Rearranging the terms and using Lemma 3 yield

$$\sum_{j_t \in \mathbb{I}_t} f_{j_t}(\mathbf{x}_{j_t}^t) - f_{j_t}(\mathbf{x}_{j_t}^*) = \sum_{j_t \in \mathbb{I}_t} [f_{j_t}(\mathbf{x}_{j_t}^{t+1}) - f_{j_t}(\mathbf{x}_{j_t}^*)] + f(\mathbf{x}^t) - f(\mathbf{x}^{t+1})$$



$$\begin{aligned}
&\leq -\frac{K}{J} \sum_{i=1}^I \left\{ \langle \mathbf{y}_i^t, \mathbf{A}_i^r \mathbf{x}^t - \mathbf{a}_i \rangle - \frac{\tau_i \rho}{2} \|\mathbf{A}_i^r \mathbf{x}^t - \mathbf{a}_i\|_2^2 \right\} \\
&\quad - \sum_{j_t \in \mathbb{I}_t} \langle \hat{\mathbf{y}}^t + \rho(\mathbf{A} \mathbf{x}^t - \mathbf{a}), \mathbf{A}_{j_t}^c (\mathbf{x}_{j_t}^t - \mathbf{x}_{j_t}^*) \rangle + \frac{K}{J} \langle \hat{\mathbf{y}}^t + \rho(\mathbf{A} \mathbf{x}^t - \mathbf{a}), \mathbf{A} \mathbf{x}^t - \mathbf{a} \rangle \\
&\quad + \tilde{\mathcal{L}}_\rho(\mathbf{x}^t, \mathbf{y}^t) - \tilde{\mathcal{L}}_\rho(\mathbf{x}^{t+1}, \mathbf{y}^{t+1}) - \frac{\rho}{2} \sum_{i=1}^I \beta_i \|\mathbf{A}_i^r \mathbf{x}^{t+1} - \mathbf{a}_i\|_2^2 \\
&\quad + \sum_{i=1}^I (\|\mathbf{z}^* - \mathbf{z}^t\|_{\mathbf{Q}}^2 - \|\mathbf{z}^* - \mathbf{z}^{t+1}\|_{\mathbf{Q}}^2 - \|\mathbf{z}^{t+1} - \mathbf{z}^t\|_{\mathbf{P}_t}^2) \\
&\quad + \sum_{j_t \in \mathbb{I}_t} [\boldsymbol{\eta}^T (B_\phi(\mathbf{x}^*, \mathbf{x}^t) - B_\phi(\mathbf{x}^*, \mathbf{x}^{t+1}) - B_\phi(\mathbf{x}^{t+1}, \mathbf{x}^t))] , \tag{43}
\end{aligned}$$

where  $\tilde{\mathcal{L}}_\rho(\mathbf{x}^t, \mathbf{y}^t)$  is defined in (41). Conditioning on  $\mathbf{x}^t$  and taking expectation over  $\mathbb{I}_t$ , we have

$$\begin{aligned}
\frac{K}{J} [f(\mathbf{x}^t) - f(\mathbf{x}^*)] &\leq -\frac{K}{J} \sum_{i=1}^I \left\{ \langle \mathbf{y}_i^t, \mathbf{A}_i^r \mathbf{x}^t - \mathbf{a}_i \rangle - \frac{\tau_i \rho}{2} \|\mathbf{A}_i^r \mathbf{x}^t - \mathbf{a}_i\|_2^2 \right\} \\
&\quad + \tilde{\mathcal{L}}_\rho(\mathbf{x}^t, \mathbf{y}^t) - \mathbb{E}_{\mathbb{I}_t} \tilde{\mathcal{L}}_\rho(\mathbf{x}^{t+1}, \mathbf{y}^{t+1}) - \frac{\rho}{2} \sum_{i=1}^I \beta_i \mathbb{E}_{\mathbb{I}_t} \|\mathbf{A}_i^r \mathbf{x}^{t+1} - \mathbf{a}_i\|_2^2 \\
&\quad + \frac{\rho}{2} (\|\mathbf{z}^* - \mathbf{z}^t\|_{\mathbf{Q}}^2 - \mathbb{E}_{\mathbb{I}_t} \|\mathbf{z}^* - \mathbf{z}^{t+1}\|_{\mathbf{Q}}^2 - \mathbb{E}_{\mathbb{I}_t} \|\mathbf{z}^{t+1} - \mathbf{z}^t\|_{\mathbf{P}_t}^2) \\
&\quad + \sum_{j_t \in \mathbb{I}_t} [\boldsymbol{\eta}^T (B_\phi(\mathbf{x}^*, \mathbf{x}^t) - \mathbb{E}_{\mathbb{I}_t} B_\phi(\mathbf{x}^*, \mathbf{x}^{t+1}) - \mathbb{E}_{\mathbb{I}_t} B_\phi(\mathbf{x}^{t+1}, \mathbf{x}^t))] , \tag{44}
\end{aligned}$$

where we use

$$\mathbb{E}_{\mathbb{I}_t} \left[ - \sum_{j_t \in \mathbb{I}_t} \langle \hat{\mathbf{y}}^t + \rho(\mathbf{A} \mathbf{x}^t - \mathbf{a}), \mathbf{A}_{j_t}^c (\mathbf{x}_{j_t}^t - \mathbf{x}_{j_t}^*) \rangle \right] = -\frac{K}{J} \langle \hat{\mathbf{y}}^t + \rho(\mathbf{A} \mathbf{x}^t - \mathbf{a}), \mathbf{A} \mathbf{x}^t - \mathbf{a} \rangle . \tag{45}$$

Dividing both sides by  $\frac{K}{J}$  and using the definition (41) complete the proof.  $\blacksquare$

## 1.2 Theoretical Results

We establish the convergence results for PDMM under fairly simple assumptions:

### Assumption 1

- (1)  $f_j : \mathbb{R}^{n_j} \rightarrow \mathbb{R} \cup \{+\infty\}$  are closed, proper, and convex.
- (2) A KKT point of the Lagrangian ( $\rho = 0$  in (2)) of Problem (1) exists.

Assumption 1 is the same as that required by ADMM [1, 4]. Let  $\partial f_j$  be the subdifferential of  $f_j$ . Assume that  $\{\mathbf{x}_j^* \in \mathcal{X}_j, \mathbf{y}_i^*\}$  satisfies the KKT conditions of the Lagrangian ( $\rho = 0$  in (2)), i.e.,

$$-\mathbf{A}_j^T \mathbf{y}^* \in \partial f_j(\mathbf{x}_j^*) , \tag{46}$$

$$\mathbf{A} \mathbf{x}^* - \mathbf{a} = 0. \tag{47}$$

During iterations, (47) is satisfied if  $\mathbf{Ax}^{t+1} = \mathbf{a}$ . Let  $f'_j(\mathbf{x}_j^{t+1}) \in \partial f_j(\mathbf{x}_j^{t+1})$  where  $x_j^{t+1} \in \mathcal{X}_j$ . For any  $\mathbf{x}_j \in \mathcal{X}_j$ , the optimality conditions for the  $\mathbf{x}_j$  update (3) is

$$\langle f'_j(\mathbf{x}_j^{t+1}) + \mathbf{A}_j^c[\hat{\mathbf{y}}^t + \rho(\mathbf{A}_j^c \mathbf{x}_j^{t+1} + \sum_{k \neq j} \mathbf{A}_k^c \mathbf{x}_k^t - \mathbf{a})] + \eta_j(\nabla \phi_j(\mathbf{x}_j^{t+1}) - \nabla \phi_j(\mathbf{x}_j^t)), \mathbf{x}_j^{t+1} - \mathbf{x}_j \rangle \leq 0, \quad (48)$$

which is sufficiently satisfied if

$$-\mathbf{A}_j^c[\mathbf{y}^t + (1 - \nu)\rho(\mathbf{Ax}^t - \mathbf{a}) + \mathbf{A}_j^c(\mathbf{x}_j^{t+1} - \mathbf{x}_j^t)] - \eta_j(\nabla \phi_j(\mathbf{x}_j^{t+1}) - \nabla \phi_j(\mathbf{x}_j^t)) = f'_j(\mathbf{x}_j^{t+1}). \quad (49)$$

When  $\mathbf{Ax}^{t+1} = \mathbf{a}$ ,  $\mathbf{y}^{t+1} = \mathbf{y}^t$ . If  $\mathbf{A}_j^c(\mathbf{x}_j^{t+1} - \mathbf{x}_j^t) = 0$ , then  $\mathbf{Ax}^t - \mathbf{a} = 0$ . When  $\eta_j \geq 0$ , further assuming  $B_{\phi_j}(\mathbf{x}_j^{t+1}, \mathbf{x}_j^t) = 0$ , (46) will be satisfied. Overall, the KKT conditions (46)-(47) are satisfied if the following optimality conditions are satisfied by the iterates:

$$\mathbf{Ax}^{t+1} = \mathbf{a}, \mathbf{A}_j^c(\mathbf{x}_j^{t+1} - \mathbf{x}_j^t) = 0, \quad (50)$$

$$B_{\phi_j}(\mathbf{x}_j^{t+1}, \mathbf{x}_j^t) = 0. \quad (51)$$

The above optimality conditions are sufficient for the KKT conditions. (50) are the optimality conditions for the exact PDMM. (51) is needed only when  $\eta_j > 0$ .

In Lemma 3, setting the values of  $\nu_i, \tau_i, \gamma_i, \beta_i$  as follows:

$$\nu_i = 1 - \frac{1}{\tilde{K}_i}, \tau_i = \frac{K}{\tilde{K}_i(2J - K)}, \gamma_i = \frac{2(J - K)}{\tilde{K}_i(2J - K)} + \frac{1}{d_i} - \frac{K}{J\tilde{K}_i}, \beta_i = \frac{K}{J\tilde{K}_i}. \quad (52)$$

Define the residual of optimality conditions (50)-(51) as

$$R(\mathbf{x}^{t+1}) = \frac{\rho}{2} \|\mathbf{z}^{t+1} - \mathbf{z}^t\|_{\mathbf{P}_t}^2 + \frac{\rho}{2} \sum_{i=1}^I \beta_i \|\mathbf{A}_i^r \mathbf{x}^{t+1} - \mathbf{a}_i\|_2^2 + [\boldsymbol{\eta}^T B_{\phi}(\mathbf{x}^{t+1}, \mathbf{x}^t)]. \quad (53)$$

If  $R(\mathbf{x}^{t+1}) \rightarrow 0$ , (50)-(51) will be satisfied and thus PDMM converges to the KKT point  $\{\mathbf{x}^*, \mathbf{y}^*\}$ .

Define the current iterate  $\mathbf{v}^t = (\mathbf{x}_j^t, \mathbf{y}_i^t)$  and  $h(\mathbf{v}^*, \mathbf{v}^t)$  as a distance from  $\mathbf{v}^t$  to a KKT point  $\mathbf{v}^* = (\mathbf{x}_j^*, \mathbf{y}_i^*)$ :

$$h(\mathbf{v}^*, \mathbf{v}^t) = \frac{K}{J} \sum_{i=1}^I \frac{1}{2\tau_i \rho} \|\mathbf{y}_i^* - \mathbf{y}_i^{t-1}\|_2^2 + \tilde{\mathcal{L}}_{\rho}(\mathbf{x}^t, \mathbf{y}^t) + \frac{\rho}{2} \|\mathbf{z}^* - \mathbf{z}^t\|_{\mathbf{Q}}^2 + \boldsymbol{\eta}^T B_{\phi}(\mathbf{x}^*, \mathbf{x}^t). \quad (54)$$

The following Lemma shows that  $h(\mathbf{v}^*, \mathbf{v}^t) \geq 0$ .

**Lemma 5** Let  $h(\mathbf{v}^*, \mathbf{v}^t)$  be defined in (54). Setting  $\nu_i = 1 - \frac{1}{\tilde{K}_i}$  and  $\tau_i = \frac{K}{\tilde{K}_i(2J - K)}$ , we have

$$h(\mathbf{v}^*, \mathbf{v}^t) \geq \frac{\rho}{2} \sum_{i=1}^I \zeta_i \|\mathbf{A}_i^r \mathbf{x}^t - \mathbf{a}_i\|_2^2 + \frac{\rho}{2} \|\mathbf{z}^* - \mathbf{z}^t\|_{\mathbf{Q}}^2 + \sum_{j=1}^J \eta_j B_{\phi_j}(\mathbf{x}_j^*, \mathbf{x}_j^t) \geq 0. \quad (55)$$

where  $\zeta_i = \frac{J - K}{\tilde{K}_i(2J - K)} + \frac{1}{d_i} - \frac{K}{J\tilde{K}_i} \geq 0$ . Moreover, if  $h(\mathbf{v}^*, \mathbf{v}^t) = 0$ , then  $\mathbf{A}_i^r \mathbf{x}^t = \mathbf{a}_i, \mathbf{z}^t = \mathbf{z}^*$  and  $B_{\phi_j}(\mathbf{x}_j^*, \mathbf{x}_j^t) = 0$ . Thus, (46)-(47) are satisfied.

*Proof:* Using the convexity of  $f$  and (46), we have

$$f(\mathbf{x}^*) - f(\mathbf{x}^t) \leq -\langle \mathbf{A}^T \mathbf{y}^*, \mathbf{x}^* - \mathbf{x}^t \rangle = \sum_{i=1}^I \langle \mathbf{y}_i^*, \mathbf{A}_i^r \mathbf{x}^t - \mathbf{a}_i \rangle. \quad (56)$$

Thus,

$$\begin{aligned} \tilde{\mathcal{L}}_\rho(\mathbf{x}^t, \mathbf{y}^t) &= f(\mathbf{x}^t) - f(\mathbf{x}^*) + \sum_{i=1}^I \left\{ \langle \mathbf{y}_i^t, \mathbf{A}_i^r \mathbf{x}^t - \mathbf{a}_i \rangle + \frac{(\gamma_i - \tau_i)\rho}{2} \|\mathbf{A}_i^r \mathbf{x}^t - \mathbf{a}_i\|_2^2 \right\} \\ &\geq \sum_{i=1}^I \left\{ \langle \mathbf{y}_i^t - \mathbf{y}_i^*, \mathbf{A}_i^r \mathbf{x}^t - \mathbf{a}_i \rangle + \frac{(\gamma_i - \tau_i)\rho}{2} \|\mathbf{A}_i^r \mathbf{x}^t - \mathbf{a}_i\|_2^2 \right\} \\ &= \sum_{i=1}^I \left\{ \langle \mathbf{y}_i^{t-1} - \mathbf{y}_i^*, \mathbf{A}_i^r \mathbf{x}^t - \mathbf{a}_i \rangle + \langle \mathbf{y}_i^t - \mathbf{y}_i^{t-1}, \mathbf{A}_i^r \mathbf{x}^t - \mathbf{a}_i \rangle + \frac{(\gamma_i - \tau_i)\rho}{2} \|\mathbf{A}_i^r \mathbf{x}^t - \mathbf{a}_i\|_2^2 \right\} \\ &\geq \sum_{i=1}^I \left[ -\frac{K}{2J\tau_i\rho} \|\mathbf{y}_i^{t-1} - \mathbf{y}_i^*\|_2^2 - \frac{J\tau_i\rho}{2K} \|\mathbf{A}_i^r \mathbf{x}^t - \mathbf{a}_i\|_2^2 + \frac{(\gamma_i + \tau_i)\rho}{2} \|\mathbf{A}_i^r \mathbf{x}^t - \mathbf{a}_i\|_2^2 \right] \\ &= \sum_{i=1}^I \left[ -\frac{K}{2J\tau_i\rho} \|\mathbf{y}_i^{t-1} - \mathbf{y}_i^*\|_2^2 + [\gamma_i + (1 - \frac{J}{K})\tau_i] \frac{\rho}{2} \|\mathbf{A}_i^r \mathbf{x}^t - \mathbf{a}_i\|_2^2 \right]. \end{aligned} \quad (57)$$

$h(\mathbf{v}^*, \mathbf{v}^t)$  is reduced to

$$h(\mathbf{v}^*, \mathbf{v}^t) \geq \frac{\rho}{2} \sum_{i=1}^I [\gamma_i + (1 - \frac{J}{K})\tau_i] \|\mathbf{A}_i^r \mathbf{x}^t - \mathbf{a}_i\|_2^2 + \frac{\rho}{2} \|\mathbf{z}^* - \mathbf{z}^t\|_{\mathbf{Q}}^2 + \boldsymbol{\eta}^T B_\phi(\mathbf{x}^*, \mathbf{x}^t). \quad (58)$$

Setting  $1 - \nu_i = \frac{1}{\tilde{K}_i}$  and  $\tau_i = \frac{K}{\tilde{K}_i(2J-K)}$ , we have

$$\begin{aligned} \gamma_i + (1 - \frac{J}{K})\tau_i &= (3 - \frac{2K}{J})(1 - \nu_i) + (1 - \frac{K}{J})\tau_i + \frac{1}{d_i} - \frac{2}{\tilde{K}_i} + (1 - \frac{J}{K})\tau_i \\ &= (1 - \frac{K}{J})\frac{1}{\tilde{K}_i} + (2 - \frac{K}{J} - \frac{J}{K})\frac{K}{\tilde{K}_i(2J-K)} + \frac{1}{d_i} - \frac{K}{J\tilde{K}_i} \\ &= \frac{(J-K)}{\tilde{K}_i(2J-K)} + \frac{1}{d_i} - \frac{K}{J\tilde{K}_i} \geq 0. \end{aligned} \quad (59)$$

Therefore,  $h(\mathbf{v}^*, \mathbf{v}^t) \geq 0$ . Letting  $\zeta_i = \frac{J-K}{\tilde{K}_i(2J-K)} + \frac{1}{d_i} - \frac{K}{J\tilde{K}_i}$  completes the proof.  $\blacksquare$

The following theorem shows that  $h(\mathbf{v}^*, \mathbf{v}^t)$  decreases monotonically and thus establishes the global convergence of PDMM.

**Theorem 1 (Global Convergence of PDMM)** Let  $\mathbf{v}^t = (\mathbf{x}_{j_t}^t, \mathbf{y}_i^t)$  be generated by PDMM (3)-(5) and  $\mathbf{v}^* = (\mathbf{x}_j^*, \mathbf{y}_i^*)$  be a KKT point satisfying (46)-(47). Setting  $\nu_i = 1 - \frac{1}{\tilde{K}_i}$  and  $\tau_i = \frac{K}{\tilde{K}_i(2J-K)}$ , we have

$$0 \leq \mathbb{E}_{\xi_t} h(\mathbf{v}^*, \mathbf{v}^{t+1}) \leq \mathbb{E}_{\xi_{t-1}} h(\mathbf{v}^*, \mathbf{v}^t), \quad \mathbb{E}_{\xi_t} R(\mathbf{x}^{t+1}) \rightarrow 0. \quad (60)$$

*Proof:* Adding (56) and (40) yields

$$\begin{aligned}
0 \leq & \sum_{i=1}^I \left\{ \langle \mathbf{y}_i^* - \mathbf{y}_i^t, \mathbf{A}_i^r \mathbf{x}^t - \mathbf{a}_i \rangle + \frac{\tau_i \rho}{2} \|\mathbf{A}_i^r \mathbf{x}^t - \mathbf{a}_i\|_2^2 \right\} \\
& + \frac{J}{K} \left\{ \tilde{\mathcal{L}}_\rho(\mathbf{x}^t, \mathbf{y}^t) - \mathbb{E}_{\mathbb{I}_t} \tilde{\mathcal{L}}_\rho(\mathbf{x}^{t+1}, \mathbf{y}^{t+1}) - \frac{\rho}{2} \sum_{i=1}^I \beta_i \mathbb{E}_{\mathbb{I}_t} \|\mathbf{A}_i^r \mathbf{x}^{t+1} - \mathbf{a}_i\|_2^2 \right. \\
& + \frac{\rho}{2} (\|\mathbf{z}^* - \mathbf{z}^t\|_{\mathbf{Q}}^2 - \mathbb{E}_{\mathbb{I}_t} \|\mathbf{z}^* - \mathbf{z}^{t+1}\|_{\mathbf{Q}}^2 - \mathbb{E}_{\mathbb{I}_t} \|\mathbf{z}^{t+1} - \mathbf{z}^t\|_{\mathbf{P}_t}^2) \\
& \left. + \boldsymbol{\eta}^T (B_\phi(\mathbf{x}^*, \mathbf{x}^t) - \mathbb{E}_{\mathbb{I}_t} B_\phi(\mathbf{x}^*, \mathbf{x}^{t+1}) - \mathbb{E}_{\mathbb{I}_t} B_\phi(\mathbf{x}^{t+1}, \mathbf{x}^t)) \right\}. \tag{61}
\end{aligned}$$

Using (4), we have

$$\begin{aligned}
& \langle \mathbf{y}_i^* - \mathbf{y}_i^t, \mathbf{A}_i^r \mathbf{x}^t - \mathbf{a}_i \rangle + \frac{\tau_i \rho}{2} \|\mathbf{A}_i^r \mathbf{x}^t - \mathbf{a}_i\|_2^2 = \frac{1}{\tau_i \rho} \langle \mathbf{y}_i^* - \mathbf{y}_i^t, \mathbf{y}_i^t - \mathbf{y}_i^{t-1} \rangle + \frac{\tau_i \rho}{2} \|\mathbf{A}_i^r \mathbf{x}^t - \mathbf{a}_i\|_2^2 \\
& = \frac{1}{2\tau_i \rho} (\|\mathbf{y}_i^* - \mathbf{y}_i^{t-1}\|_2^2 - \|\mathbf{y}_i^* - \mathbf{y}_i^t\|_2^2). \tag{62}
\end{aligned}$$

Plugging back into (61) gives

$$\begin{aligned}
0 \leq & \sum_{i=1}^I \frac{1}{2\tau_i \rho} (\|\mathbf{y}_i^* - \mathbf{y}_i^{t-1}\|_2^2 - \|\mathbf{y}_i^* - \mathbf{y}_i^t\|_2^2) \\
& + \frac{J}{K} \left\{ \tilde{\mathcal{L}}_\rho(\mathbf{x}^t, \mathbf{y}^t) - \mathbb{E}_{\mathbb{I}_t} \tilde{\mathcal{L}}_\rho(\mathbf{x}^{t+1}, \mathbf{y}^{t+1}) - \frac{\rho}{2} \sum_{i=1}^I \beta_i \mathbb{E}_{\mathbb{I}_t} \|\mathbf{A}_i^r \mathbf{x}^{t+1} - \mathbf{a}_i\|_2^2 \right. \\
& + \frac{\rho}{2} (\|\mathbf{z}^* - \mathbf{z}^t\|_{\mathbf{Q}}^2 - \mathbb{E}_{\mathbb{I}_t} \|\mathbf{z}^* - \mathbf{z}^{t+1}\|_{\mathbf{Q}}^2 - \mathbb{E}_{\mathbb{I}_t} \|\mathbf{z}^{t+1} - \mathbf{z}^t\|_{\mathbf{P}_t}^2) \\
& \left. + \boldsymbol{\eta}^T (B_\phi(\mathbf{x}^*, \mathbf{x}^t) - \mathbb{E}_{\mathbb{I}_t} B_\phi(\mathbf{x}^*, \mathbf{x}^{t+1}) - \mathbb{E}_{\mathbb{I}_t} B_\phi(\mathbf{x}^{t+1}, \mathbf{x}^t)) \right\} \\
& = \frac{J}{K} \{ h(\mathbf{v}^*, \mathbf{v}^t) - \mathbb{E}_{\mathbb{I}_t} h(\mathbf{v}^*, \mathbf{v}^{t+1}) - \mathbb{E}_{\mathbb{I}_t} R(\mathbf{x}^{t+1}) \}. \tag{63}
\end{aligned}$$

Taking expectation over  $\xi_{t-1}$ , we have

$$0 \leq \frac{J}{K} \{ \mathbb{E}_{\xi_{t-1}} h(\mathbf{v}^*, \mathbf{v}^t) - \mathbb{E}_{\xi_t} h(\mathbf{v}^*, \mathbf{v}^{t+1}) - \mathbb{E}_{\xi_t} R(\mathbf{x}^{t+1}) \}. \tag{64}$$

Since  $\mathbb{E}_{\xi_t} R(\mathbf{x}^{t+1}) \geq 0$ , we have

$$\mathbb{E}_{\xi_t} h(\mathbf{v}^*, \mathbf{v}^{t+1}) \leq \mathbb{E}_{\xi_{t-1}} h(\mathbf{v}^*, \mathbf{v}^t). \tag{65}$$

Thus,  $\mathbb{E}_{\xi_t} h(\mathbf{v}^*, \mathbf{v}^{t+1})$  converges monotonically.

Rearranging the terms in (64) yields

$$\mathbb{E}_{\xi_t} R(\mathbf{x}^{t+1}) \leq \mathbb{E}_{\xi_{t-1}} h(\mathbf{v}^*, \mathbf{v}^t) - \mathbb{E}_{\xi_t} h(\mathbf{v}^*, \mathbf{v}^{t+1}). \tag{66}$$

Summing over  $t$  gives

$$\sum_{t=0}^{T-1} \mathbb{E}_{\xi_t} R(\mathbf{x}^{t+1}) \leq h(\mathbf{v}^*, \mathbf{v}^0) - \mathbb{E}_{\xi_{T-1}} h(\mathbf{v}^*, \mathbf{v}^T) \leq h(\mathbf{v}^*, \mathbf{v}^0). \quad (67)$$

where the last inequality uses the Lemma 5. As  $T \rightarrow \infty$ ,  $\mathbb{E}_{\xi_t} R(\mathbf{x}^{t+1}) \rightarrow 0$ , which completes the proof. ■

The following theorem establishes the iteration complexity of PDMM in an ergodic sense.

**Theorem 2** *Let  $(\mathbf{x}_j^t, \mathbf{y}_i^t)$  be generated by PDMM (3)-(5). Let  $\bar{\mathbf{x}}^T = \sum_{t=1}^T \mathbf{x}^t$ . Setting  $\nu_i = 1 - \frac{1}{\bar{K}_i}$  and  $\tau_i = \frac{K}{\bar{K}_i(2J-K)}$ , we have*

$$\mathbb{E} f(\bar{\mathbf{x}}^T) - f(\mathbf{x}^*) \leq \frac{\sum_{i=1}^I \frac{1}{2\tau_i\rho} \|\mathbf{y}_i^0\|_2^2 + \frac{J}{K} \left\{ \frac{1}{2\beta_i\rho} \|\mathbf{y}_i^*\|_2^2 + \tilde{\mathcal{L}}_\rho(\mathbf{x}^1, \mathbf{y}^1) + \frac{\rho}{2} \|\mathbf{z}^* - \mathbf{z}^1\|_{\mathbf{Q}}^2 + \boldsymbol{\eta}^T B_\phi(\mathbf{x}^*, \mathbf{x}^1) \right\}}{T}, \quad (68)$$

$$\mathbb{E} \sum_{i=1}^I \beta_i \|\mathbf{A}_i^r \bar{\mathbf{x}}^T - \mathbf{a}_i\|_2^2 \leq \frac{\frac{2}{\rho} h(\mathbf{v}^*, \mathbf{v}^0)}{T}. \quad (69)$$

where  $\beta_i = \frac{K}{JK_i}$ .

*Proof:* Using (5) and, we have

$$\begin{aligned} & - \sum_{i=1}^I \left\{ \langle \mathbf{y}_i^t, \mathbf{A}_i^r \mathbf{x}^t - \mathbf{a}_i \rangle - \frac{\tau_i \rho}{2} \|\mathbf{A}_i^r \mathbf{x}^t - \mathbf{a}_i\|_2^2 \right\} \\ &= - \sum_{i=1}^I \left\{ \frac{1}{\tau_i \rho} \langle \mathbf{y}_i^t, \mathbf{y}_i^t - \mathbf{y}_i^{t-1} \rangle - \frac{1}{2\tau_i \rho} \|\mathbf{y}_i^t - \mathbf{y}_i^{t-1}\|_2^2 \right\} \\ &= \sum_{i=1}^I \frac{1}{2\tau_i \rho} (\|\mathbf{y}_i^{t-1}\|_2^2 - \|\mathbf{y}_i^t\|_2^2). \end{aligned} \quad (70)$$

Plugging back into (40) yields

$$\begin{aligned} f(\mathbf{x}^t) - f(\mathbf{x}^*) &\leq \sum_{i=1}^I \frac{1}{2\tau_i \rho} (\|\mathbf{y}_i^{t-1}\|_2^2 - \|\mathbf{y}_i^t\|_2^2) \\ &+ \frac{J}{K} \left\{ \tilde{\mathcal{L}}_\rho(\mathbf{x}^t, \mathbf{y}^t) - \mathbb{E}_{\mathbb{I}_t} \tilde{\mathcal{L}}_\rho(\mathbf{x}^{t+1}, \mathbf{y}^{t+1}) - \frac{\rho}{2} \sum_{i=1}^I \beta_i \mathbb{E}_{\mathbb{I}_t} \|\mathbf{A}_i^r \mathbf{x}^{t+1} - \mathbf{a}_i\|_2^2 \right. \\ &+ \frac{\rho}{2} (\|\mathbf{z}^* - \mathbf{z}^t\|_{\mathbf{Q}}^2 - \mathbb{E}_{\mathbb{I}_t} \|\mathbf{z}^* - \mathbf{z}^{t+1}\|_{\mathbf{Q}}^2 - \mathbb{E}_{\mathbb{I}_t} \|\mathbf{z}^{t+1} - \mathbf{z}^t\|_{\mathbf{P}_t}^2) \\ &\left. + \boldsymbol{\eta}^T (B_\phi(\mathbf{x}^*, \mathbf{x}^t) - \mathbb{E}_{\mathbb{I}_t} B_\phi(\mathbf{x}^*, \mathbf{x}^{t+1}) - \mathbb{E}_{\mathbb{I}_t} B_\phi(\mathbf{x}^{t+1}, \mathbf{x}^t)) \right\}. \end{aligned} \quad (71)$$

Taking expectation over  $\xi_{t-1}$ , we have

$$\mathbb{E}_{\xi_{t-1}} f(\mathbf{x}^t) - f(\mathbf{x}^*) \leq \sum_{i=1}^I \frac{1}{2\tau_i \rho} (\mathbb{E}_{\xi_{t-2}} \|\mathbf{y}_i^{t-1}\|_2^2 - \mathbb{E}_{\xi_{t-1}} \|\mathbf{y}_i^t\|_2^2)$$

$$\begin{aligned}
& + \frac{J}{K} \left\{ \mathbb{E}_{\xi_{t-1}} \tilde{\mathcal{L}}_\rho(\mathbf{x}^t, \mathbf{y}^t) - \mathbb{E}_{\xi_t} \tilde{\mathcal{L}}_\rho(\mathbf{x}^{t+1}, \mathbf{y}^{t+1}) - \frac{\rho}{2} \sum_{i=1}^I \beta_i \mathbb{E}_{\xi_t} \|\mathbf{A}_i^r \mathbf{x}^{t+1} - \mathbf{a}_i\|_2^2 \right. \\
& + \frac{\rho}{2} (\mathbb{E}_{\xi_{t-1}} \|\mathbf{z}^* - \mathbf{z}^t\|_{\mathbf{Q}}^2 - \mathbb{E}_{\xi_t} \|\mathbf{z}^* - \mathbf{z}^{t+1}\|_{\mathbf{Q}}^2 - \mathbb{E}_{\xi_t} \|\mathbf{z}^{t+1} - \mathbf{z}^t\|_{\mathbf{P}_t}^2) \\
& \left. + \boldsymbol{\eta}^T (\mathbb{E}_{\xi_{t-1}} B_\phi(\mathbf{x}^*, \mathbf{x}^t) - \mathbb{E}_{\xi_t} B_\phi(\mathbf{x}^*, \mathbf{x}^{t+1}) - \mathbb{E}_{\xi_t} B_\phi(\mathbf{x}^{t+1}, \mathbf{x}^t)) \right\}. \tag{72}
\end{aligned}$$

Summing over  $t$ , we have

$$\begin{aligned}
\sum_{t=1}^T \mathbb{E}_{\xi_{t-1}} f(\mathbf{x}^t) - f(\mathbf{x}^*) & \leq \sum_{i=1}^I \frac{1}{2\tau_i \rho} (\|\mathbf{y}_i^0\|_2^2 - \mathbb{E}_{\xi_{T-1}} \|\mathbf{y}_i^T\|_2^2) \\
& + \frac{J}{K} \left\{ \tilde{\mathcal{L}}_\rho(\mathbf{x}^1, \mathbf{y}^1) - \mathbb{E}_{\xi_T} \tilde{\mathcal{L}}_\rho(\mathbf{x}^{T+1}, \mathbf{y}^{T+1}) - \frac{\rho}{2} \sum_{t=1}^T \sum_{i=1}^I \beta_i \mathbb{E}_{\xi_t} \|\mathbf{A}_i^r \mathbf{x}^{t+1} - \mathbf{a}_i\|_2^2 \right. \\
& + \frac{\rho}{2} (\|\mathbf{z}^* - \mathbf{z}^1\|_{\mathbf{Q}}^2 - \mathbb{E}_{\xi_T} \|\mathbf{z}^* - \mathbf{z}^{T+1}\|_{\mathbf{Q}}^2 - \mathbb{E}_{\xi_T} \|\mathbf{z}^{T+1} - \mathbf{z}^T\|_{\mathbf{Q}}^2) \\
& \left. + \boldsymbol{\eta}^T (B_\phi(\mathbf{x}^*, \mathbf{x}^1) - \mathbb{E}_{\xi_T} B_\phi(\mathbf{x}^*, \mathbf{x}^{T+1}) - \mathbb{E}_{\xi_T} B_\phi(\mathbf{x}^{T+1}, \mathbf{x}^T)) \right\}. \tag{73}
\end{aligned}$$

Using (56), we have

$$\begin{aligned}
\tilde{\mathcal{L}}_\rho(\mathbf{x}^{T+1}, \mathbf{y}^{T+1}) & = f(\mathbf{x}^{T+1}) - f(\mathbf{x}^*) + \sum_{i=1}^I [\langle \mathbf{y}_i^{T+1}, \mathbf{A}_i \mathbf{x}^{T+1} - \mathbf{a}_i \rangle + \frac{(\gamma_i - \tau_i)\rho}{2} \|\mathbf{A}_i \mathbf{x}^{T+1} - \mathbf{a}_i\|_2^2] \\
& \geq - \sum_{i=1}^I \langle \mathbf{y}_i^*, \mathbf{A}_i^r \mathbf{x}^{T+1} - \mathbf{a}_i \rangle + \sum_{i=1}^I [\langle \mathbf{y}_i^T, \mathbf{A}_i \mathbf{x}^{T+1} - \mathbf{a}_i \rangle + \frac{(\gamma_i + \tau_i)\rho}{2} \|\mathbf{A}_i \mathbf{x}^{T+1} - \mathbf{a}_i\|_2^2] \\
& \geq - \sum_{i=1}^I \left( \frac{1}{2\delta_i} \|\mathbf{y}_i^*\|_2^2 + \frac{\delta_i}{2} \|\mathbf{A}_i^r \mathbf{x}^{T+1} - \mathbf{a}_i\|_2^2 \right) + \sum_{i=1}^I \left[ -\frac{K}{2J\tau_i\rho} \|\mathbf{y}_i^T\|_2^2 + [\gamma_i + (1 - \frac{J}{K})\tau_i] \frac{\rho}{2} \|\mathbf{A}_i \mathbf{x}^{T+1} - \mathbf{a}_i\|_2^2 \right] \\
& \geq - \sum_{i=1}^I \left( \frac{1}{2\delta_i} \|\mathbf{y}_i^*\|_2^2 + \frac{\delta_i}{2} \|\mathbf{A}_i^r \mathbf{x}^{T+1} - \mathbf{a}_i\|_2^2 \right) - \sum_{i=1}^I \frac{K}{2J\tau_i\rho} \|\mathbf{y}_i^T\|_2^2, \tag{74}
\end{aligned}$$

where  $\delta_i > 0$  and the last inequality uses (59). Plugging into (73), we have

$$\begin{aligned}
\sum_{t=1}^T \mathbb{E}_{\xi_{t-1}} f(\mathbf{x}^t) - f(\mathbf{x}^*) & \leq \sum_{i=1}^I \frac{1}{2\tau_i \rho} \|\mathbf{y}_i^0\|_2^2 + \frac{J}{K} \left\{ \tilde{\mathcal{L}}_\rho(\mathbf{x}^1, \mathbf{y}^1) + \frac{\rho}{2} \|\mathbf{z}^* - \mathbf{z}^1\|_{\mathbf{Q}}^2 + \boldsymbol{\eta}^T B_\phi(\mathbf{x}^*, \mathbf{x}^1) \right\} \\
& + \frac{J}{K} \left\{ \sum_{i=1}^I \left[ \frac{1}{2\delta_i} \|\mathbf{y}_i^*\|_2^2 + \frac{\delta_i - \beta_i \rho}{2} \mathbb{E} \|\mathbf{A}_i^r \mathbf{x}^{T+1} - \mathbf{a}_i\|_2^2 \right] \right\}. \tag{75}
\end{aligned}$$

Settin  $\delta_i = \beta_i \rho$ , dividing by  $T$  and letting  $\bar{\mathbf{x}}^T = \frac{1}{T} \sum_{t=1}^T \mathbf{x}^t$  complete the proof.

Dividing both sides of (67) by  $T$  yields (69). ■

## 2 Connection to ADMM

In this section, we use ADMM to solve (1), similar as [5, 3] but with different forms. We show that ADMM is a special case of PDMM. The connection can help us understand why the two parameters  $\tau_i, \nu_i$  in PDMM are necessary. We first introduce splitting variables  $\mathbf{z}_i$  as follows:

$$\min \sum_{j=1}^J f_j(\mathbf{x}_j) \quad \text{s.t.} \quad \mathbf{A}_j \mathbf{x}_j = \mathbf{z}_j, \sum_{j=1}^J \mathbf{z}_j = \mathbf{a}, \quad (76)$$

which can be written as

$$\min \sum_{j=1}^K f_j(\mathbf{x}_j) + g(\mathbf{z}) \quad \text{s.t.} \quad \mathbf{A}_j \mathbf{x}_j = \mathbf{z}_j, \quad (77)$$

where  $g(\mathbf{z})$  is an indicator function of  $\sum_{j=1}^K \mathbf{z}_j = \mathbf{a}$ . The augmented Lagrangian is

$$\mathcal{L}_\rho(\mathbf{x}_j, \mathbf{z}_j, \mathbf{y}_j) = \sum_{j=1}^J \left[ f_j(\mathbf{x}_j) + \langle \mathbf{y}_j, \mathbf{A}_j \mathbf{x}_j - \mathbf{z}_j \rangle + \frac{\rho}{2} \|\mathbf{A}_j \mathbf{x}_j - \mathbf{z}_j\|_2^2 \right], \quad (78)$$

where  $\mathbf{y}_j$  is the dual variable. We have the following ADMM iterates:

$$\mathbf{x}_j^{t+1} = \operatorname{argmin}_{\mathbf{x}_j} f_j(\mathbf{x}_j) + \langle \mathbf{y}_j^t, \mathbf{A}_j \mathbf{x}_j - \mathbf{z}_j^t \rangle + \frac{\rho}{2} \|\mathbf{A}_j \mathbf{x}_j - \mathbf{z}_j^t\|_2^2, \quad (79)$$

$$\mathbf{z}^{t+1} = \operatorname{argmin}_{\sum_{j=1}^K \mathbf{z}_j = \mathbf{a}} \sum_{j=1}^K \left[ \langle \mathbf{y}_j^t, \mathbf{A}_j \mathbf{x}_j^{t+1} - \mathbf{z}_j \rangle + \frac{\rho}{2} \|\mathbf{A}_j \mathbf{x}_j^{t+1} - \mathbf{z}_j\|_2^2 \right], \quad (80)$$

$$\mathbf{y}_j^{t+1} = \mathbf{y}_j^t + \rho(\mathbf{A}_j \mathbf{x}_j^{t+1} - \mathbf{z}_j^{t+1}). \quad (81)$$

The Lagrangian of (80) is

$$\mathcal{L} = \sum_{j=1}^J \left[ \langle \mathbf{y}_j^t, \mathbf{A}_j \mathbf{x}_j^{t+1} - \mathbf{z}_j \rangle + \frac{\rho}{2} \|\mathbf{A}_j \mathbf{x}_j^{t+1} - \mathbf{z}_j\|_2^2 \right] + \langle \boldsymbol{\lambda}, \sum_{j=1}^J \mathbf{z}_j - \mathbf{a} \rangle, \quad (82)$$

where  $\boldsymbol{\lambda}$  is the dual variable. The first order optimality is

$$-\mathbf{y}_j^t + \rho(\mathbf{z}_j^{t+1} - \mathbf{A}_j \mathbf{x}_j^{t+1}) + \boldsymbol{\lambda} = \mathbf{0}. \quad (83)$$

Using (81) gives

$$\boldsymbol{\lambda} = \mathbf{y}_j^{t+1}, \quad \forall j. \quad (84)$$

Denoting  $\mathbf{y}^t = \mathbf{y}_j^t$ , (83) becomes

$$\mathbf{y}^{t+1} = \mathbf{y}^t + \rho(\mathbf{A}_j \mathbf{x}_j^{t+1} - \mathbf{z}_j^{t+1}). \quad (85)$$

Summing over  $j$  and using the constraint  $\sum_{j=1}^J \mathbf{z}_j = \mathbf{a}$ , we have

$$\mathbf{y}^{t+1} = \mathbf{y}^t + \frac{\rho}{J}(\mathbf{A} \mathbf{x}^{t+1} - \mathbf{a}). \quad (86)$$

Subtracting (85) from (86), simple calculations yields

$$\mathbf{z}_j^{t+1} = \mathbf{A}_j \mathbf{x}_j^{t+1} + \frac{1}{J}(\mathbf{A} \mathbf{x}^{t+1} - \mathbf{a}). \quad (87)$$

Plugging into (79), we have

$$\begin{aligned} \mathbf{x}_j^{t+1} &= \operatorname{argmin}_{\mathbf{x}_j} f_j(\mathbf{x}_j) + \langle \mathbf{y}^t, \mathbf{A}_j \mathbf{x}_j \rangle + \frac{\rho}{2} \|\mathbf{A}_j \mathbf{x}_j - \mathbf{z}_j^t\|_2^2 \\ &= \operatorname{argmin}_{\mathbf{x}_j} f_j(\mathbf{x}_j) + \langle \mathbf{y}^t, \mathbf{A}_j \mathbf{x}_j \rangle + \frac{\rho}{2} \|\mathbf{A}_j \mathbf{x}_j - \mathbf{A}_j \mathbf{x}_j^t + \frac{\mathbf{A} \mathbf{x}^t - \mathbf{a}}{J}\|_2^2 \\ &= \operatorname{argmin}_{\mathbf{x}_j} f_j(\mathbf{x}_j) + \langle \hat{\mathbf{y}}^t, \mathbf{A}_j \mathbf{x}_j \rangle + \frac{\rho}{2} \|\mathbf{A}_j \mathbf{x}_j + \sum_{k \neq j} \mathbf{A}_k \mathbf{x}_k^t - \mathbf{a}\|_2^2, \end{aligned} \quad (88)$$

where  $\hat{\mathbf{y}}^t = \mathbf{y}^t - (1 - \frac{1}{J})\rho(\mathbf{A} \mathbf{x}^t - \mathbf{a})$ , which becomes PDMM by setting  $\tau = \frac{1}{J}, \nu = 1 - \frac{1}{J}$  and updating all blocks. Therefore, splitting ADMM (SADMM) is a special case of PDMM.

### 3 Inexact PDMM and connection to PJADMM

In this section, we only consider the case when all blocks are used in PDMM. We show that if setting  $\eta_j$  sufficiently large, the dual backward step (5) is not needed, which becomes PJADMM [2]. Together with the connection between PDMM and sADMM in Section 2, sADMM and PJADMM are two extreme cases of PDMM. If the primal update makes sufficient progress, the dual update should take small step, e.g., sADMM. On the other hand, if the primal update makes conservative progress, the dual update can take full gradient step, e.g. PJADMM. While sADMM is a direct derivation of ADMM, PJADMM introduces more terms and parameters.

**Corollary 1** *Let  $\{\mathbf{x}_j^t, \mathbf{y}_i^t\}$  be generated by PDMM (3)-(5). Assume  $\tau_i > 0$  and  $\nu_i \geq 0$ . We have*

$$\begin{aligned} f(\mathbf{x}^{t+1}) - f(\mathbf{x}^*) &\leq \sum_{i=1}^I \left\{ -\langle \mathbf{y}_i^{t+1}, \mathbf{A}_i^r \mathbf{x}^{t+1} - \mathbf{a}_i \rangle + \frac{\tau_i \rho}{2} \|\mathbf{A}_i^r \mathbf{x}^{t+1} - \mathbf{a}_i\|_2^2 \right\} \\ &\quad + \frac{\rho}{2} (\|\mathbf{z}^t - \mathbf{z}^*\|_{\mathbf{Q}}^2 - \|\mathbf{z}^{t+1} - \mathbf{z}^*\|_{\mathbf{Q}}^2 - \|\mathbf{z}^{t+1} - \mathbf{z}^t\|_{\mathbf{Q}}^2) \\ &\quad + \frac{\rho}{2} \sum_{i=1}^I \left\{ (\nu_i - 1 + \frac{1}{d_i}) (\|\mathbf{A}_i^r \mathbf{x}^t - \mathbf{a}_i\|_2^2 - \|\mathbf{A}_i^r \mathbf{x}^{t+1} - \mathbf{a}_i\|_2^2) \right. \\ &\quad \left. + (\tau_i + 2\nu_i - 2) \|\mathbf{A}_i^r \mathbf{x}^{t+1} - \mathbf{a}_i\|_2^2 + (1 - \nu_i - \frac{1}{d_i}) \|\mathbf{A}_i^r (\mathbf{x}^{t+1} - \mathbf{x}^t)\|_2^2 \right\} \\ &\quad + \sum_{j=1}^J \eta_j \left( B_{\phi_j}(\mathbf{x}_j^*, \mathbf{x}_j^t) - B_{\phi_j}(\mathbf{x}_j^*, \mathbf{x}_j^{t+1}) - B_{\phi_j}(\mathbf{x}_j^{t+1}, \mathbf{x}_j^t) \right). \end{aligned} \quad (89)$$

*Proof:* Let  $\mathbb{I}_t$  be all blocks,  $K = J$ . According the definition of  $\mathbf{P}_t$  in (7) and  $\mathbf{Q}$  in (13),  $\mathbf{P}_t = \mathbf{Q}$ . Therefore, (16) reduces to

$$f(\mathbf{x}^{t+1}) - f(\mathbf{x}^*) \leq \sum_{i=1}^I \left\{ -\langle \mathbf{y}_i^{t+1}, \mathbf{A}_i^r \mathbf{x}^{t+1} - \mathbf{a}_i \rangle + \frac{\tau_i \rho}{2} \|\mathbf{A}_i^r \mathbf{x}^{t+1} - \mathbf{a}_i\|_2^2 \right\}$$



$$\begin{aligned}
& + \frac{\rho}{2} (\|\mathbf{z}^t - \mathbf{z}^*\|_{\mathbf{Q}}^2 - \|\mathbf{z}^{t+1} - \mathbf{z}^*\|_{\mathbf{Q}}^2 - \|\mathbf{z}^{t+1} - \mathbf{z}^t\|_{\mathbf{Q}}^2) \\
& + \sum_{j=1}^J \eta_j \left( B_{\phi_j}(\mathbf{x}_j^*, \mathbf{x}_j^t) - B_{\phi_j}(\mathbf{x}_j^*, \mathbf{x}_j^{t+1}) - B_{\phi_j}(\mathbf{x}_j^{t+1}, \mathbf{x}_j^t) \right) \\
& + \frac{\rho}{2} \sum_{i=1}^I \left\{ \left( \nu_i - 1 + \frac{1}{d_i} \right) \|\mathbf{A}_i^r \mathbf{x}^t - \mathbf{a}_i\|_2^2 - \left( 1 - \nu_i - \tau_i + \frac{1}{d_i} \right) \|\mathbf{A}_i^r \mathbf{x}^{t+1} - \mathbf{a}_i\|_2^2 + \left( 1 - \nu_i - \frac{1}{d_i} \right) \|\mathbf{A}_i^r (\mathbf{x}^{t+1} - \mathbf{x}^t)\|_2^2 \right\}.
\end{aligned} \tag{90}$$

Rearranging the terms completes the proof.  $\blacksquare$

**Corollary 2** Let  $\{\mathbf{x}_j^t, \mathbf{y}_i^t\}$  be generated by PDMM (3)-(5). Assume (1)  $\tau_i > 0$  and  $\nu_i \geq 0$ ; (2)  $\eta_j > 0$ ; (3)  $\phi_j$  is  $\alpha_j$ -strongly convex. We have

$$\begin{aligned}
f(\mathbf{x}^{t+1}) - f(\mathbf{x}^*) & \leq \sum_{i=1}^I \left\{ -\langle \mathbf{y}_i^{t+1}, \mathbf{A}_i^r \mathbf{x}^{t+1} - \mathbf{a}_i \rangle + \frac{\tau_i \rho}{2} \|\mathbf{A}_i^r \mathbf{x}^{t+1} - \mathbf{a}_i\|_2^2 \right\} \\
& + \frac{\rho}{2} (\|\mathbf{z}^t - \mathbf{z}^*\|_{\mathbf{Q}}^2 - \|\mathbf{z}^{t+1} - \mathbf{z}^*\|_{\mathbf{Q}}^2 - \|\mathbf{z}^{t+1} - \mathbf{z}^t\|_{\mathbf{Q}}^2) \\
& + \sum_{j=1}^J \eta_j \left( B_{\phi_j}(\mathbf{x}_j^*, \mathbf{x}_j^t) - B_{\phi_j}(\mathbf{x}_j^*, \mathbf{x}_j^{t+1}) \right).
\end{aligned} \tag{91}$$

$\nu_i$  and  $\tau_i$  satisfy  $\nu_i \in [1 - \frac{1}{d_i} - \frac{\eta_j \alpha_j}{\rho I d_i \lambda_{\max}^{ij}}, 1 - \frac{1}{d_i}]$  and  $\tau_i \leq 1 + \frac{1}{d_i} - \nu_i$ , where  $\lambda_{\max}^{ij}$  is the largest eigenvalue of  $\mathbf{A}_{ij}^T \mathbf{A}_{ij}$ . In particular, if  $\eta_j = \frac{(d_i-1)\rho I \lambda_{\max}^{ij}}{\alpha_j}$ ,  $\nu_i = 0$  and  $\tau_i \leq 1 + \frac{1}{d_i}$ .

*Proof:* Assume  $\eta_j > 0$ . We can choose larger  $\tau_i$  and smaller  $\nu_i$  than Lemma 3 by setting  $\eta_j$  sufficiently large. Since  $\phi_j$  is  $\alpha_j$ -strongly convex,  $B_{\phi_j}(\mathbf{x}_j^{t+1}, \mathbf{x}_j^t) \geq \frac{\alpha_j}{2} \|\mathbf{x}_j^{t+1} - \mathbf{x}_j^t\|_2^2$ . We have

$$\sum_{j=1}^J \eta_j B_{\phi_j}(\mathbf{x}_j^{t+1}, \mathbf{x}_j^t) \geq \sum_{i=1}^I \sum_{j=1}^J \frac{\eta_j \alpha_j}{2I} \|\mathbf{x}_j^{t+1} - \mathbf{x}_j^t\|_2^2 \geq \sum_{i=1}^I \sum_{j \in \mathcal{N}(i)} \frac{\eta_j \alpha_j}{2I \lambda_{\max}^{ij}} \|\mathbf{A}_{ij}(\mathbf{x}_j^{t+1} - \mathbf{x}_j^t)\|_2^2. \tag{92}$$

$$\|\mathbf{A}_i^r (\mathbf{x}^{t+1} - \mathbf{x}^t)\|_2^2 = \left\| \sum_{j \in \mathcal{N}(i)} \mathbf{A}_{ij}(\mathbf{x}_j^{t+1} - \mathbf{x}_j^t) \right\|_2^2 \leq d_i \sum_{j \in \mathcal{N}(i)} \|\mathbf{A}_{ij}(\mathbf{x}_j^{t+1} - \mathbf{x}_j^t)\|_2^2, \tag{93}$$

where  $\lambda_{\max}^{ij}$  is the largest eigenvalue of  $\mathbf{A}_{ij}^T \mathbf{A}_{ij}$ . Plugging into (89) gives

$$\begin{aligned}
f(\mathbf{x}^{t+1}) - f(\mathbf{x}^*) & \leq \sum_{i=1}^I \left\{ -\langle \mathbf{y}_i^{t+1}, \mathbf{A}_i^r \mathbf{x}^{t+1} - \mathbf{a}_i \rangle + \frac{\tau_i \rho}{2} \|\mathbf{A}_i^r \mathbf{x}^{t+1} - \mathbf{a}_i\|_2^2 \right\} \\
& + \frac{\rho}{2} (\|\mathbf{z}^t - \mathbf{z}^*\|_{\mathbf{Q}}^2 - \|\mathbf{z}^{t+1} - \mathbf{z}^*\|_{\mathbf{Q}}^2 - \|\mathbf{z}^{t+1} - \mathbf{z}^t\|_{\mathbf{Q}}^2) \\
& + \frac{\rho}{2} \sum_{i=1}^I \left\{ \left( \nu_i - 1 + \frac{1}{d_i} \right) (\|\mathbf{A}_i^r \mathbf{x}^t - \mathbf{a}_i\|_2^2 - \|\mathbf{A}_i^r \mathbf{x}^{t+1} - \mathbf{a}_i\|_2^2) \right\}
\end{aligned}$$

$$\begin{aligned}
& +(\tau_i + 2\nu_i - 2)\|\mathbf{A}_i^r \mathbf{x}^{t+1} - \mathbf{a}_i\|_2^2 + \sum_{j \in \mathcal{N}(i)} \left[ (1 - \nu_i)d_i - 1 - \frac{\eta_j \alpha_j}{\rho I \lambda_{\max}^{ij}} \right] \|\mathbf{A}_{ij}(\mathbf{x}_j^{t+1} - \mathbf{x}_j^t)\|_2^2 \Big\} \\
& + \sum_{j=1}^J \eta_j \left( B_{\phi_j}(\mathbf{x}_j^*, \mathbf{x}_j^t) - B_{\phi_j}(\mathbf{x}_j^*, \mathbf{x}_j^{t+1}) \right) .
\end{aligned} \tag{94}$$

If  $(1 - \nu_i)d_i - 1 - \frac{\eta_j \alpha_j}{\rho I \lambda_{\max}^{ij}} \leq 0$ , i.e.,  $\nu_i \geq 1 - \frac{1}{d_i} - \frac{\eta_j \alpha_j}{\rho I d_i \lambda_{\max}^{ij}}$ , we have

$$\begin{aligned}
f(\mathbf{x}^{t+1}) - f(\mathbf{x}^*) & \leq \frac{\rho}{2} \sum_{i=1}^I \left\{ -\frac{2}{\rho} \langle \mathbf{y}_i^{t+1}, \mathbf{A}_i^r \mathbf{x}^{t+1} - \mathbf{a}_i \rangle + \tau_i \|\mathbf{A}_i^r \mathbf{x}^{t+1} - \mathbf{a}_i\|_2^2 \right\} \\
& + \frac{\rho}{2} (\|\mathbf{z}^t - \mathbf{z}^*\|_{\mathbf{Q}}^2 - \|\mathbf{z}^{t+1} - \mathbf{z}^*\|_{\mathbf{Q}}^2 - \|\mathbf{z}^{t+1} - \mathbf{z}^t\|_{\mathbf{Q}}^2) \\
& + \sum_{i=1}^J \eta_i \left( B_{\phi_i}(\mathbf{x}_i^*, \mathbf{x}_i^t) - B_{\phi_i}(\mathbf{x}_i^*, \mathbf{x}_i^{t+1}) \right) \\
& + \frac{\rho}{2} \sum_{i=1}^I \left\{ -(\nu_i - 1 + \frac{1}{d_i}) \|\mathbf{A}_i^r \mathbf{x}^{t+1} - \mathbf{a}_i\|_2^2 + (\tau_i - 2 + 2\nu_i) \|\mathbf{A}_i^r \mathbf{x}^{t+1} - \mathbf{a}_i\|_2^2 \right\} .
\end{aligned} \tag{95}$$

If  $\tau_i - 2 + 2\nu_i - (\nu_i - 1 + \frac{1}{d_i}) \leq 0$ , i.e.,  $\tau_i \leq 1 + \frac{1}{d_i} - \nu_i$ , the last two terms in (95) can be removed. Therefore, when  $\nu_i \geq 1 - \frac{1}{d_i} - \frac{\eta_j \alpha_j}{\rho I d_i \lambda_{\max}^{ij}}$  and  $\tau_i \leq 1 + \frac{1}{d_i} - \nu_i$ , we have (91).  $\blacksquare$

Define the current iterate  $\mathbf{v}^t = (\mathbf{x}_j^t, \mathbf{y}_i^t)$  and  $h(\mathbf{v}^*, \mathbf{v}^t)$  as a distance from  $\mathbf{v}^t$  to a KKT point  $\mathbf{v}^* = (\mathbf{x}_j^*, \mathbf{y}_i^*)$ :

$$h(\mathbf{v}^*, \mathbf{v}^t) = \sum_{i=1}^I \frac{1}{2\tau_i \rho} \|\mathbf{y}_i^* - \mathbf{y}_i^t\|_2^2 + \frac{\rho}{2} \|\mathbf{u}^t - \mathbf{u}^*\|_{\mathbf{Q}}^2 + \sum_{j=1}^J \eta_j B_{\phi_j}(\mathbf{x}_j^*, \mathbf{x}_j^t) . \tag{96}$$

The following theorem shows that  $h(\mathbf{v}^*, \mathbf{v}^t)$  decreases monotonically and thus establishes the global convergence of PDMM.

**Theorem 3 (Global Convergence of PDMM)** Let  $\mathbf{v}^t = (\mathbf{x}_j^t, \mathbf{y}_i^t)$  be generated by PDMM (3)-(5) and  $\mathbf{v}^* = (\mathbf{x}_j^*, \mathbf{y}_i^*)$  be a KKT point satisfying (46)-(47). Assume  $\tau_i, \nu_i$  and  $\gamma_i$  satisfy conditions in Lemma 2. Then  $\mathbf{v}^t$  converges to the KKT point  $\mathbf{v}^*$  monotonically, i.e.,

$$h(\mathbf{v}^*, \mathbf{v}^{t+1}) \leq h(\mathbf{v}^*, \mathbf{v}^t) \tag{97}$$

*Proof:* Adding (56) and (91) together yields

$$\begin{aligned}
0 & \leq \sum_{i=1}^I \left\{ \langle \mathbf{y}_i^* - \mathbf{y}_i^{t+1}, \mathbf{A}_i^r \mathbf{x}^{t+1} - \mathbf{a}_i \rangle + \frac{\tau_i \rho}{2} \|\mathbf{A}_i^r \mathbf{x}^{t+1} - \mathbf{a}_i\|_2^2 \right\} \\
& + \frac{\rho}{2} (\|\mathbf{u}^t - \mathbf{u}^*\|_{\mathbf{Q}}^2 - \|\mathbf{u}^{t+1} - \mathbf{u}^*\|_{\mathbf{Q}}^2 - \|\mathbf{u}^{t+1} - \mathbf{u}^t\|_{\mathbf{Q}}^2) \\
& + \sum_{j=1}^J \eta_j \left( B_{\phi_j}(\mathbf{x}_j^*, \mathbf{x}_j^t) - B_{\phi_j}(\mathbf{x}_j^*, \mathbf{x}_j^{t+1}) \right) .
\end{aligned} \tag{98}$$

The first term in the bracket can be rewritten as

$$\begin{aligned}
\langle \mathbf{y}_i^* - \mathbf{y}_i^{t+1}, \mathbf{A}_i^r \mathbf{x}^{t+1} - \mathbf{a}_i \rangle &= \frac{1}{\tau_i \rho} \langle \mathbf{y}_i^* - \mathbf{y}_i^{t+1}, \mathbf{y}_i^{t+1} - \mathbf{y}_i^t \rangle \\
&= \frac{1}{2\tau_i \rho} (\|\mathbf{y}_i^* - \mathbf{y}_i^t\|_2^2 - \|\mathbf{y}_i^* - \mathbf{y}_i^{t+1}\|_2^2 - \|\mathbf{y}_i^{t+1} - \mathbf{y}_i^t\|_2^2) \\
&= \frac{1}{2\tau_i \rho} (\|\mathbf{y}_i^* - \mathbf{y}_i^t\|_2^2 - \|\mathbf{y}_i^* - \mathbf{y}_i^{t+1}\|_2^2) - \frac{\tau_i \rho}{2} \|\mathbf{A}_i^r \mathbf{x}^{t+1} - \mathbf{a}_i\|_2^2.
\end{aligned} \tag{99}$$

Plugging back into (98) yields

$$\begin{aligned}
0 &\leq \sum_{i=1}^I \frac{1}{2\tau_i \rho} (\|\mathbf{y}_i^* - \mathbf{y}_i^t\|_2^2 - \|\mathbf{y}_i^* - \mathbf{y}_i^{t+1}\|_2^2) \\
&\quad + \frac{\rho}{2} (\|\mathbf{u}^t - \mathbf{u}^*\|_{\mathbf{Q}}^2 - \|\mathbf{u}^{t+1} - \mathbf{u}^*\|_{\mathbf{Q}}^2 - \|\mathbf{u}^{t+1} - \mathbf{u}^t\|_{\mathbf{Q}}^2) \\
&\quad + \sum_{j=1}^J \eta_j \left( B_{\phi_j}(\mathbf{x}_j^*, \mathbf{x}_j^t) - B_{\phi_j}(\mathbf{x}_j^*, \mathbf{x}_j^{t+1}) \right).
\end{aligned} \tag{100}$$

Rearranging the terms completes the proof.  $\blacksquare$

The following theorem establishes the  $O(1/T)$  convergence rate for the objective in an ergodic sense.

**Theorem 4** *Let  $(\mathbf{x}_j^t, \mathbf{y}_i^t)$  be generated by PDMM (3)-(5). Assume  $\tau_i, \nu_i \geq 0$  satisfy conditions in Lemma 2. Let  $\bar{\mathbf{x}}^T = \sum_{t=1}^T \mathbf{x}^t$ . We have*

$$f(\bar{\mathbf{x}}^T) - f(\mathbf{x}^*) \leq \frac{\frac{1}{2\tau\rho} \|\mathbf{y}^0\|_2^2 + \frac{\rho}{2} \|\mathbf{u}^0 - \mathbf{u}^*\|_{\mathbf{Q}}^2 + \sum_{j=1}^J \eta_j B_{\phi_j}(\mathbf{x}_j^*, \mathbf{x}_j^0)}{T}, \tag{101}$$

*Proof:* Using (4), we have

$$\begin{aligned}
-\langle \mathbf{y}_i^{t+1}, \mathbf{A}_i^r \mathbf{x}^{t+1} - \mathbf{a}_i \rangle &= -\frac{1}{\tau_i \rho} \langle \mathbf{y}_i^{t+1}, \mathbf{y}_i^{t+1} - \mathbf{y}_i^t \rangle \\
&= \frac{1}{2\tau_i \rho} (\|\mathbf{y}_i^t\|_2^2 - \|\mathbf{y}_i^{t+1}\|_2^2 - \|\mathbf{y}_i^{t+1} - \mathbf{y}_i^t\|_2^2) \\
&= \frac{1}{2\tau_i \rho} (\|\mathbf{y}_i^t\|_2^2 - \|\mathbf{y}_i^{t+1}\|_2^2) - \frac{\tau_i \rho}{2} \|\mathbf{A}_i^r \mathbf{x}^{t+1} - \mathbf{a}_i\|_2^2.
\end{aligned} \tag{102}$$

Plugging into (91) yields

$$\begin{aligned}
f(\mathbf{x}^{t+1}) - f(\mathbf{x}^*) &\leq \sum_{i=1}^I \frac{1}{2\tau_i \rho} (\|\mathbf{y}_i^t\|_2^2 - \|\mathbf{y}_i^{t+1}\|_2^2) \\
&\quad + \frac{\rho}{2} (\|\mathbf{u}^t - \mathbf{u}^*\|_{\mathbf{Q}}^2 - \|\mathbf{u}^{t+1} - \mathbf{u}^*\|_{\mathbf{Q}}^2 - \|\mathbf{u}^{t+1} - \mathbf{u}^t\|_{\mathbf{Q}}^2) \\
&\quad + \sum_{j=1}^J \eta_j \left( B_{\phi_j}(\mathbf{x}_j^*, \mathbf{x}_j^t) - B_{\phi_j}(\mathbf{x}_j^*, \mathbf{x}_j^{t+1}) \right).
\end{aligned} \tag{103}$$

Summing over  $t$  from 0 to  $T - 1$ , we have

$$\begin{aligned}
\sum_{t=0}^{T-1} [f(\mathbf{x}^{t+1}) - f(\mathbf{x}^*)] &\leq \sum_{i=1}^I \frac{1}{2\tau_i\rho} (\|\mathbf{y}_i^t\|_2^2 - \|\mathbf{y}_i^{t+1}\|_2^2) \\
&+ \frac{\rho}{2} (\|\mathbf{u}^0 - \mathbf{u}^*\|_{\mathbf{Q}}^2 - \|\mathbf{u}^T - \mathbf{u}^*\|_{\mathbf{Q}}^2) \\
&+ \sum_{j=1}^J \eta_j \left( B_{\phi_j}(\mathbf{x}_j^*, \mathbf{x}_j^t) - B_{\phi_j}(\mathbf{x}_j^*, \mathbf{x}_j^{t+1}) \right). \tag{104}
\end{aligned}$$

Applying the Jensen's inequality on the LHS and using  $\bar{\mathbf{x}}^T = \sum_{t=1}^T \mathbf{x}^t$  complete the proof.  $\blacksquare$

If  $\eta_j = \frac{(d_i-1)\rho I \lambda_{\max}^{ij}}{\alpha_j}$ ,  $\nu_i = 0$  and  $\tau_i = 1$ . Therefore, PDMM becomes PJADMM [2], where the convergence rate of PJADMM has been improved to  $o(1/T)$ .

## References

- [1] S. Boyd, E. Chu N. Parikh, B. Peleato, and J. Eckstein. Distributed optimization and statistical learning via the alternating direction method of multipliers. *Foundation and Trends Machine Learning*, 3(1):1–122, 2011.
- [2] W. Deng, M. Lai, Z. Peng, and W. Yin. Parallel multi-block admm with  $o(1/k)$  convergence. *ArXiv*, 2014.
- [3] N. Parikh and S. Boyd. Proximal algorithms. *Foundations and Trends in Optimization*, 1:123–231, 2014.
- [4] H. Wang and A. Banerjee. Online alternating direction method. In *International Conference on Machine Learning (ICML)*, 2012.
- [5] X. Wang, M. Hong, S. Ma, and Z. Luo. Solving multiple-block separable convex minimization problems using two-block alternating direction method of multipliers. *Preprint*, 2013.
